# Supplementary material for: Structural Dynamics Predominantly Determine the Adaptability of Proteins to Amino Acid Deletions
Source: MDPI journal article supplement (doi:10.3390/ijms24098450), 2023-05-08
Supplement: s1 [file s1]

*Supplementary Information for*

# **Structural Dynamics Predominantly Determine the Adaptability of Proteins to Amino Acid Deletions**

**Anupam Banerjee<sup>1,\*</sup> and Ivet Bahar<sup>1,2,\*</sup>**

<sup>1</sup> Laufer Center for Physical and Quantitative Biology, Stony Brook University, Stony Brook, NY 11794, USA

<sup>2</sup> Department of Biochemistry and Cell Biology, Stony Brook University, Stony Brook, NY 11794, USA

\* Correspondence: anupam.banerjee@stonybrook.edu (A.B.); bahar@laufercenter.org (I.B.)

### Mean Z-Score of attributes in mAA-del stretch

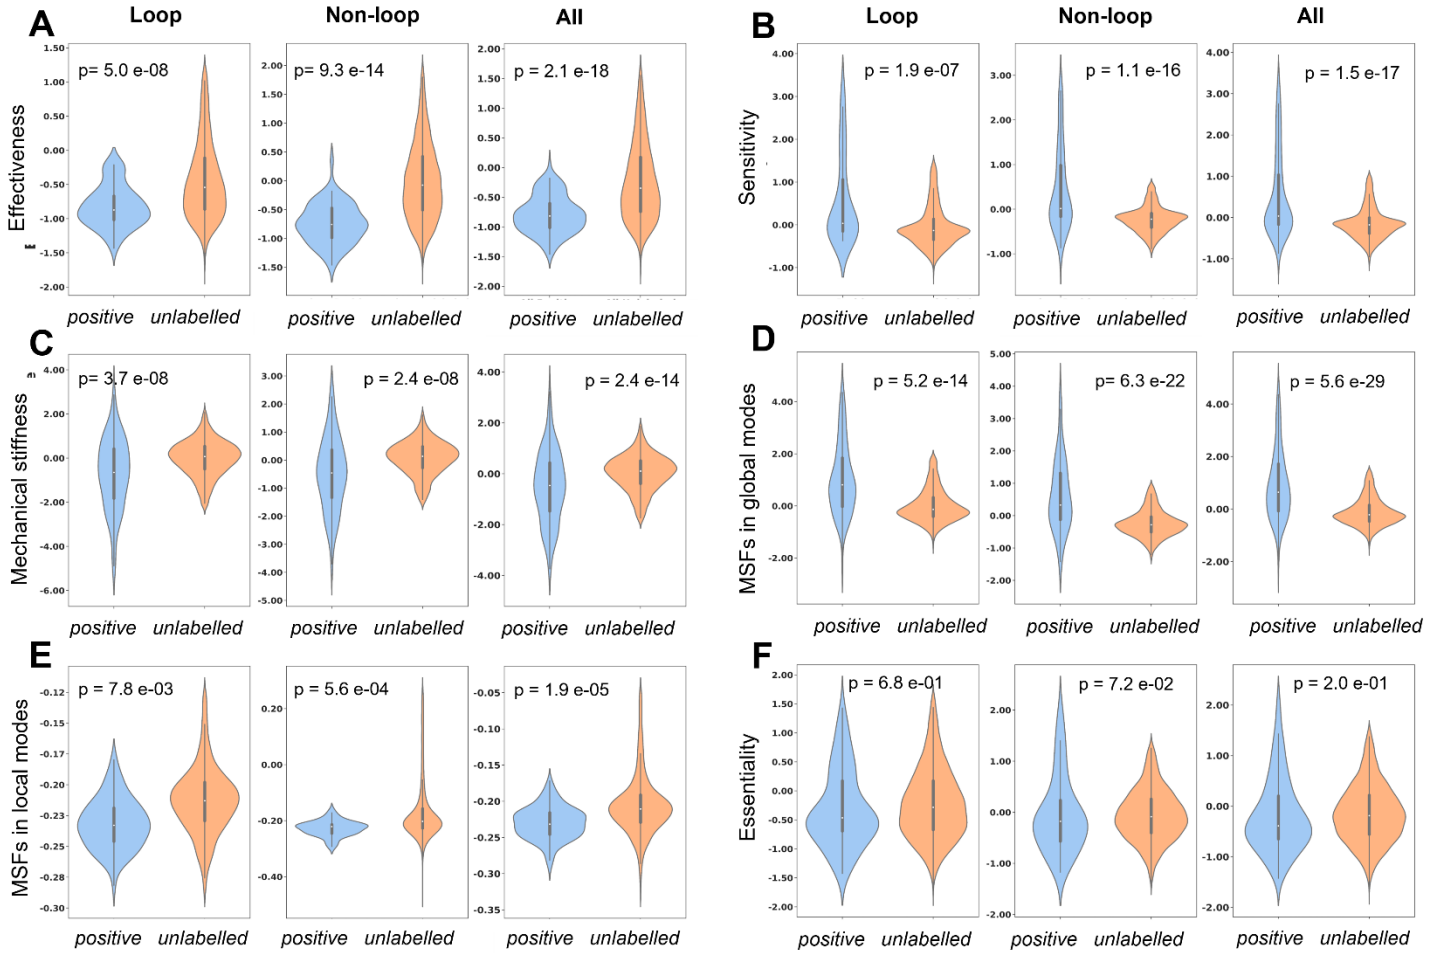

**Figure S1. The <Z-score> for dynamics-based features of mAA-del residues (prior to deletion) are differentially distributed in the positive and unlabeled mAA-del subsets.** The violin plots show the distribution of <Z-Scores> (averaged over the  $n_{AA}$  residues belonging to each mAA-del) for (A) effectiveness, (B) sensitivity, (C) mechanical stiffness, (D) MSFs in (global modes, (E) MSFs in local modes, and (F) essentiality (ESSA score) for positive and unlabeled mAA-dels in the loop, non-loop and combined dataset.

### Maximum Z-Score of attributes in mAA-del stretch

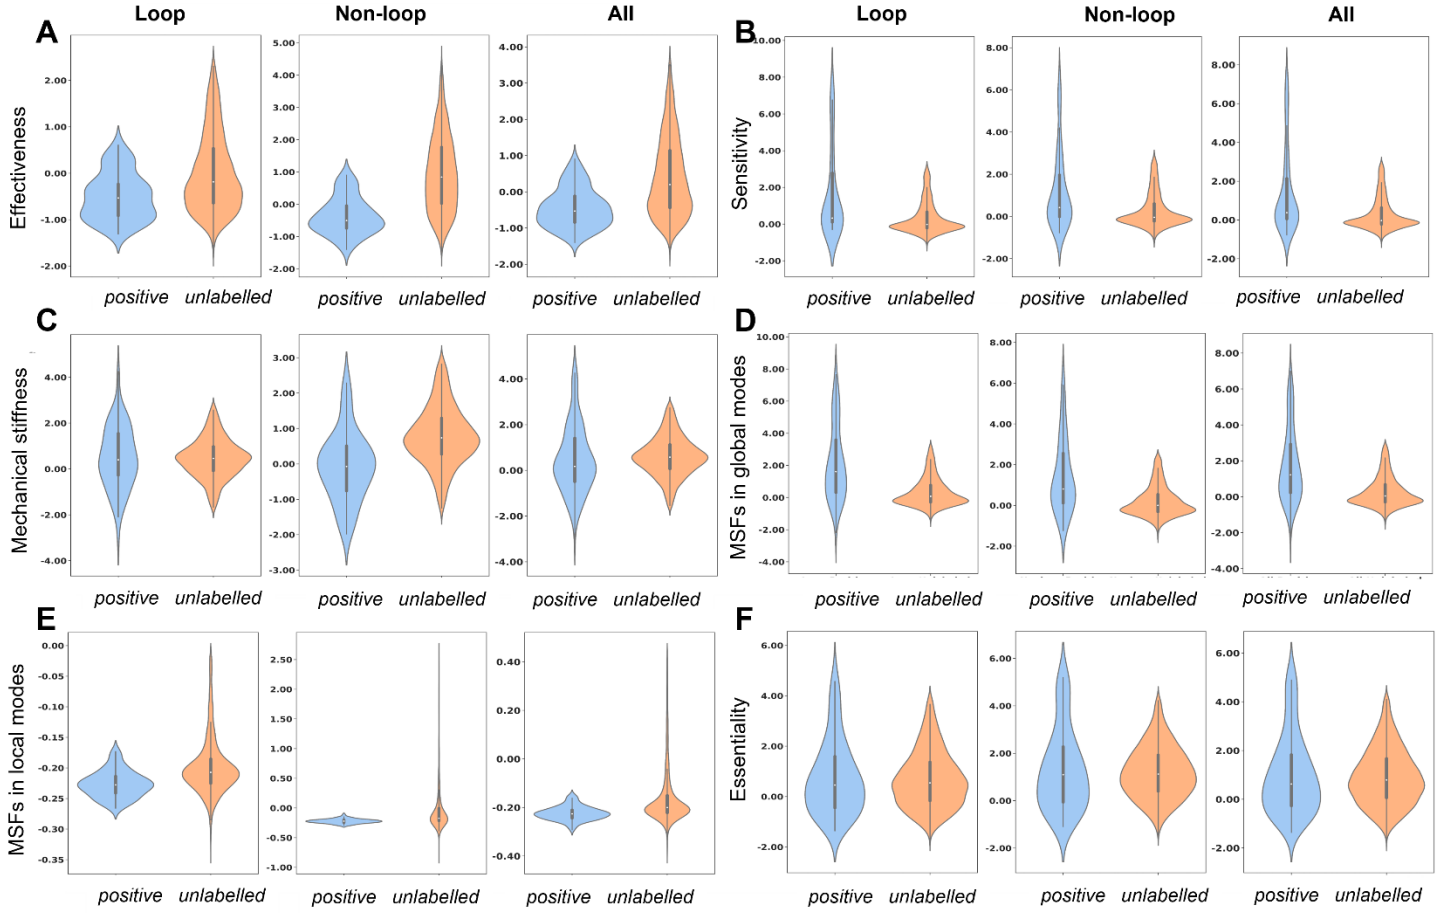

**Figure S2. Differential distribution of maximum Z-Scores associated with dynamics-based features between the positive and unlabeled mAA-del subsets.** The violin plots show the distribution of maximum Z-Scores (averaged over all residues in each mAA-del) for (A) effectiveness, (B) sensitivity, (C) mechanical stiffness, (D) MSFs in (global modes, (E) MSFs in local modes, and (F) essentiality (ESSA score) for positive and unlabeled mAA-dels in the loop, non-loop and combined dataset.

### Minimum Z-Score of attributes in mAA-del stretch

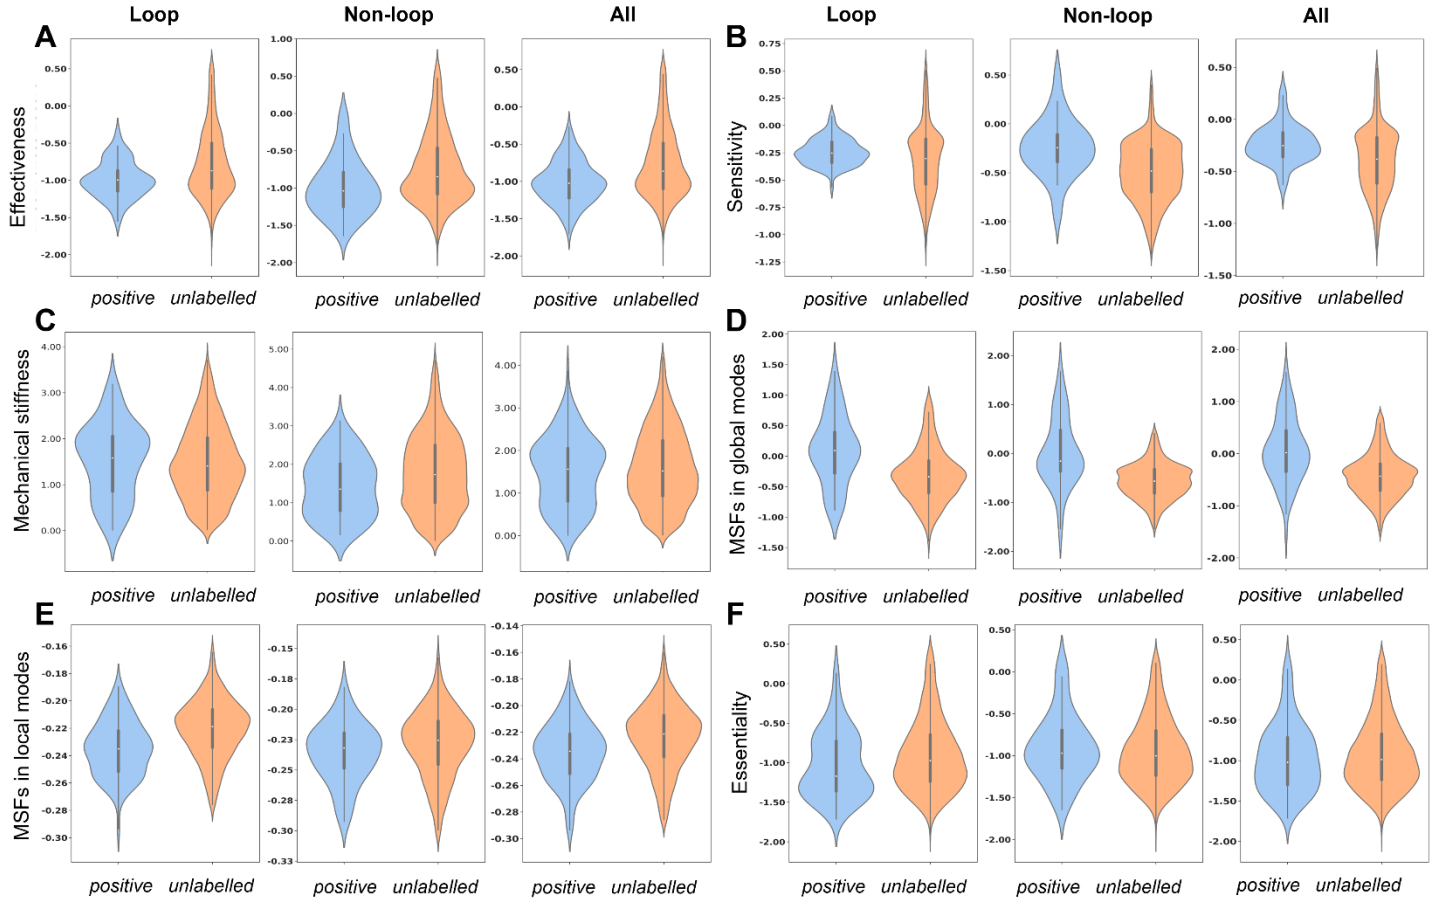

**Figure S3. Differential distribution of minimum Z-Scores associated with dynamics-based features between the positive and unlabeled mAA-del subsets.** The violin plots show the distribution of minimum Z-Scores (averaged over all residues in each mAA-del) for (A) *effectiveness*, (B) *sensitivity*, (C) *mechanical stiffness*, (D) *MSFs in (global modes*, (E) *MSFs in local modes*, and (F) *essentiality (ESSA score)* for positive and unlabeled mAA-dels in the loop, non-loop and combined dataset.

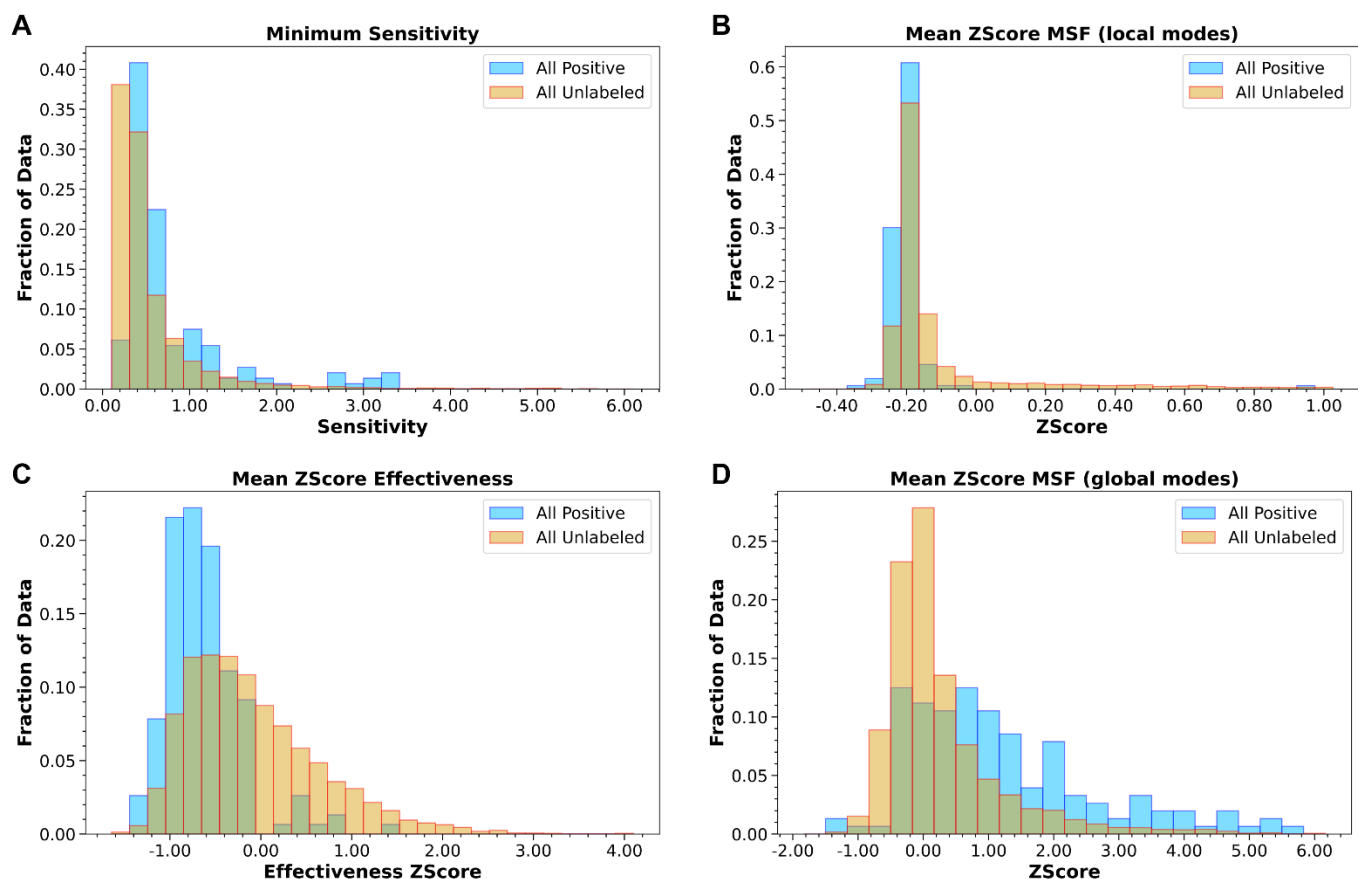

**Figure S4. Distinctive distribution of dynamics-based features for positive and unlabeled mAA-dels.** Histograms for the maximally contributing features (highest bar of each color from Figure 5A) from the four highest contributing types of dynamics-based features (Figure 5B). The distribution are plotted for (A) minimum sensitivity, (B) MSFs (local modes) <Z-Score>, (C) effectiveness <Z-Score>, and (D) MSFs in global modes <Z-score> as observed in the positive and unlabeled subsets of the combined set (of mAA-dels in loops and non-loops).

**Table S1. Median and mean±SD of dynamics features for all positive and unlabeled mAA-dels in the loop, non-loop, and combined datasets**

| Features             |       | Median  |         |          |         |          |         | Mean±SD         |                 |                 |                 |                 |                 |
|----------------------|-------|---------|---------|----------|---------|----------|---------|-----------------|-----------------|-----------------|-----------------|-----------------|-----------------|
|                      |       | Loop    |         | Non-loop |         | Combined |         | Loop            |                 | Nonloop         |                 | Combined        |                 |
|                      |       | P*      | U       | P        | U       | P        | U       | P               | U               | P               | U               | P               | U               |
| Effectiveness        | Min#  | 0.03    | 0.18    | 0.03     | 0.22    | 0.03     | 0.19    | 0.13±0.24       | 0.71±2.52       | 0.23±0.35       | 0.60±1.80       | 0.17±0.30       | 0.66±2.24       |
|                      | Max   | 0.46    | 0.57    | 0.52     | 1.09    | 0.48     | 0.79    | 0.52±0.49       | 1.60±6.12       | 0.70±0.75       | 2.45±6.99       | 0.60±0.62       | 1.96±6.52       |
|                      | Mean  | 0.22    | 0.37    | 0.26     | 0.64    | 0.24     | 0.48    | 0.30±0.33       | 1.07±3.49       | 0.43±0.51       | 1.28±2.91       | 0.35±0.42       | 1.16±3.26       |
|                      | MinZ  | -0.99   | -0.84   | -1.02    | -0.81   | -1.00    | -0.83   | -0.96±0.32      | -0.68±0.64      | -0.93±0.49      | -0.64±0.66      | -0.95±0.41      | -0.66±0.65      |
|                      | MaxZ  | -0.53   | -0.16   | -0.42    | 0.87    | -0.51    | 0.23    | -0.50±0.50      | 0.09±0.98       | -0.28±0.66      | 1.03±1.33       | -0.41±0.58      | 0.49±1.23       |
|                      | < Z > | -0.84   | -0.51   | -0.73    | -0.05   | -0.79    | -0.33   | -0.77±0.37      | -0.34±0.73      | -0.65±0.51      | 0.05±0.75       | -0.72±0.44      | -0.17±0.76      |
| Sensitivity          | Min   | 0.45    | 0.33    | 0.44     | 0.19    | 0.45     | 0.26    | 1.09±1.93       | 0.96±7.89       | 0.90±1.42       | 0.36±1.59       | 1.01±1.73       | 0.70±6.05       |
|                      | Max   | 1.25    | 0.78    | 1.45     | 0.79    | 1.32     | 0.79    | 9.67±27.03      | 7.34±109.64     | 5.33±15.49      | 1.92±11.49      | 7.80±22.88      | 5.00±83.07      |
|                      | Mean  | 0.82    | 0.55    | 0.92     | 0.43    | 0.85     | 0.49    | 3.79±7.24       | 2.65±25.96      | 2.33±5.10       | 0.85±3.76       | 3.16±6.44       | 1.87±19.75      |
|                      | MinZ  | -0.24   | -0.26   | -0.21    | -0.47   | -0.23    | -0.35   | 0.08±1.11       | -0.14±0.72      | -0.03±0.85      | -0.44±0.48      | 0.04±1.01       | -0.27±0.64      |
|                      | MaxZ  | 0.51    | 0.08    | 0.46     | 0.02    | 0.48     | 0.06    | 2.04±2.94       | 0.80±1.80       | 1.79±2.74       | 0.65±1.52       | 1.93±2.86       | 0.73±1.68       |
|                      | < Z > | 0.05    | -0.10   | 0.04     | -0.19   | 0.04     | -0.14   | 0.83±1.53       | 0.24±1.03       | 0.64±1.24       | -0.06±0.67      | 0.75±1.41       | 0.11±0.90       |
| Mechanical stiffness | Min   | 1.64    | 1.42    | 1.41     | 1.73    | 1.58     | 1.53    | 1.63±0.92       | 1.51±0.84       | 1.45±0.82       | 1.80±1.00       | 1.55±0.89       | 1.64±0.92       |
|                      | Max   | 2.03    | 1.52    | 1.61     | 1.90    | 1.85     | 1.65    | 1.88±0.94       | 1.61±0.87       | 1.64±0.89       | 1.96±1.06       | 1.78±0.93       | 1.76±0.97       |
|                      | Mean  | 1.95    | 1.47    | 1.53     | 1.82    | 1.73     | 1.59    | 1.75±0.92       | 1.56±0.85       | 1.55±0.85       | 1.88±1.03       | 1.66±0.90       | 1.70±0.95       |
|                      | MinZ  | -1.49   | -0.38   | -0.99    | -0.51   | -1.31    | -0.43   | -1.79±2.11      | -0.65±1.33      | -1.46±1.78      | -0.70±1.09      | -1.64±1.98      | -0.67±1.23      |
|                      | MaxZ  | 0.33    | 0.48    | 0.10     | 0.75    | 0.15     | 0.60    | 0.33±1.59       | 0.52±1.17       | 0.42±1.74       | 0.86±1.04       | 0.37±1.66       | 0.67±1.13       |
|                      | < Z > | -0.65   | 0.04    | -0.46    | 0.11    | -0.49    | 0.08    | -0.71±1.60      | -0.10±1.02      | -0.50±1.42      | 0.02±0.73       | -0.62±1.53      | -0.05±0.91      |
| MSF (Global)         | Min   | 0.01    | 0.01    | 0.02     | 0.01    | 0.02     | 0.01    | 0.04±0.07       | 0.02±0.05       | 0.03±0.02       | 0.01±0.03       | 0.03±0.05       | 0.02±0.04       |
|                      | Max   | 0.04    | 0.02    | 0.05     | 0.02    | 0.04     | 0.02    | 0.10±0.16       | 0.04±0.09       | 0.06±0.06       | 0.03±0.05       | 0.08±0.13       | 0.04±0.08       |
|                      | Mean  | 0.03    | 0.02    | 0.03     | 0.01    | 0.03     | 0.01    | 0.07±0.10       | 0.03±0.06       | 0.04±0.04       | 0.02±0.04       | 0.06±0.08       | 0.03±0.05       |
|                      | MinZ  | 0.15    | -0.30   | -0.15    | -0.54   | 0.07     | -0.40   | 0.31±1.03       | -0.13±0.83      | 0.15±0.91       | -0.47±0.59      | 0.24±0.98       | -0.28±0.76      |
|                      | MaxZ  | 1.61    | 0.18    | 0.88     | 0.09    | 1.25     | 0.14    | 2.16±2.28       | 0.78±1.73       | 1.57±2.09       | 0.49±1.27       | 1.90±2.22       | 0.66±1.55       |
|                      | < Z > | 0.83    | -0.07   | 0.44     | -0.25   | 0.67     | -0.17   | 1.17±1.52       | 0.26±1.11       | 0.81±1.35       | -0.08±0.72      | 1.02±1.46       | 0.11±0.97       |
| MSF (Local Modes)    | Min   | 2.5E-07 | 9.8E-07 | 3.7E-07  | 1.8E-06 | 2.6E-07  | 1.3E-06 | 3.3E-06±9.9E-06 | 4.5E-05±4.7E-04 | 5.8E-06±2.1E-05 | 4.8E-05±3.6E-04 | 4.3E-06±1.6E-05 | 4.6E-05±4.2E-04 |
|                      | Max   | 1.2E-05 | 4.7E-05 | 1.4E-05  | 3.7E-04 | 1.4E-05  | 1.1E-04 | 6.1E-05±2.4E-04 | 1.6E-03±5.0E-03 | 2.8E-04±8.8E-04 | 4.8E-03±8.7E-03 | 1.6E-04±6.1E-04 | 3.0E-03±7.0E-03 |
|                      | Mean  | 4.2E-06 | 1.9E-05 | 4.8E-06  | 1.0E-04 | 4.2E-06  | 4.1E-05 | 2.0E-05±6.2E-05 | 4.1E-04±1.5E-03 | 9.9E-05±3.9E-04 | 8.6E-04±1.9E-03 | 5.4E-05±2.6E-04 | 6.1E-04±1.7E-03 |
|                      | MinZ  | -0.24   | -0.22   | -0.23    | -0.23   | -0.24    | -0.22   | -0.24±0.02      | -0.21±0.17      | -0.24±0.06      | -0.23±0.12      | -0.24±0.04      | -0.22±0.15      |
|                      | MaxZ  | -0.23   | -0.20   | -0.22    | -0.12   | -0.22    | -0.19   | -0.22±0.07      | 0.29±1.64       | -0.15±0.32      | 1.15±2.43       | -0.19±0.22      | 0.66±2.06       |
|                      | < Z > | -0.23   | -0.21   | -0.22    | -0.19   | -0.23    | -0.20   | -0.23±0.03      | -0.09±0.50      | -0.21±0.15      | 0.01±0.52       | -0.22±0.10      | -0.05±0.51      |
| E                    | Min   | -1.04   | -0.94   | -0.94    | -0.98   | -0.97    | -0.96   | -0.80±0.87      | -0.79±0.68      | -0.76±0.66      | -0.87±0.54      | -0.78±0.78      | -0.82±0.63      |

|                    |       |       |       |       |       |       |                |            |            |            |            |            |
|--------------------|-------|-------|-------|-------|-------|-------|----------------|------------|------------|------------|------------|------------|
| <b>Max</b>         | 0.52  | 0.60  | 1.12  | 1.15  | 0.63  | 0.83  | 1.03±1.90      | 0.87±1.48  | 1.37±1.79  | 1.28±1.25  | 1.17±1.86  | 1.05±1.40  |
| <b>Mean</b>        | -0.44 | -0.25 | -0.16 | -0.07 | -0.30 | -0.16 | -0.05<br>±1.13 | -0.09±0.88 | 0.13±1.03  | 0.00±0.60  | 0.03±1.09  | -0.05±0.77 |
| <b>MinZ</b>        | -1.04 | -0.94 | -0.94 | -0.98 | -0.97 | -0.96 | -0.80<br>±0.87 | -0.79±0.68 | -0.76±0.66 | -0.87±0.54 | -0.78±0.78 | -0.82±0.63 |
| <b>MaxZ</b>        | 0.52  | 0.60  | 1.12  | 1.15  | 0.63  | 0.83  | 1.03±1.90      | 0.87±1.48  | 1.37±1.79  | 1.28±1.25  | 1.17±1.86  | 1.05±1.40  |
| <b>&lt; Z &gt;</b> | -0.44 | -0.25 | -0.16 | -0.07 | -0.30 | -0.16 | -0.05<br>±1.13 | -0.09±0.88 | 0.13±1.03  | 0.00±0.60  | 0.03±1.09  | -0.05±0.77 |

\*P stands for positive mAA-dels and U stands for unlabeled mAA-dels

#Min, Max, Mean, MinZ, MaxZ and <Z> represent minimum, maximum, mean, minimum ZScore, maximum ZScore and mean ZScore values of individual features for all residues within a given mAA-del, based on the subsets of data.

**Table S2.** Statistical testing (two population hypothesis testing) of all dynamics features computed for positive and unlabeled mAA-dels in the loop, non-loop, and combined datasets

| Features             |        | t-test (Equal variance) |         |         |         |          |         |        |         | t-test (Unequal variance) |         |          |         |       |         | Z-test (Equal Variance) |         |          |         |
|----------------------|--------|-------------------------|---------|---------|---------|----------|---------|--------|---------|---------------------------|---------|----------|---------|-------|---------|-------------------------|---------|----------|---------|
|                      |        | Loop                    |         | Nonloop |         | Combined |         | Loop   |         | Nonloop                   |         | Combined |         | Loop  |         | Nonloop                 |         | Combined |         |
|                      |        | t*                      | p       | t       | p       | t        | p       | t      | p       | t                         | p       | t        | p       | t     | p       | t                       | p       | t        | p       |
| Effectiveness        | Min    | -2.13                   | 3.3E-02 | -1.69   | 9.1E-02 | -2.70    | 6.9E-03 | -12.45 | 1.2E-32 | -7.02                     | 7.3E-11 | -13.92   | 6.4E-39 | -2.13 | 3.3E-02 | -1.69                   | 9.1E-02 | -2.70    | 6.9E-03 |
|                      | Max    | -1.64                   | 1.0E-01 | -2.02   | 4.3E-02 | -2.58    | 9.8E-03 | -10.08 | 5.2E-23 | -11.38                    | 1.4E-26 | -15.14   | 3.9E-48 | -1.64 | 1.0E-01 | -2.02                   | 4.3E-02 | -2.58    | 9.8E-03 |
|                      | Mean   | -2.08                   | 3.8E-02 | -2.38   | 1.7E-02 | -3.08    | 2.1E-03 | -12.21 | 1.3E-31 | -10.54                    | 2.0E-20 | -16.04   | 1.3E-49 | -2.08 | 3.8E-02 | -2.38                   | 1.7E-02 | -3.08    | 2.1E-03 |
|                      | Min Z  | -4.13                   | 3.8E-05 | -3.60   | 3.3E-04 | -5.47    | 4.6E-08 | -7.88  | 4.2E-12 | -4.72                     | 1.2E-05 | -8.55    | 7.3E-15 | -4.13 | 3.7E-05 | -3.60                   | 3.2E-04 | -5.47    | 4.5E-08 |
|                      | Max Z  | -5.56                   | 2.9E-08 | -7.99   | 1.8E-15 | -8.97    | 3.5E-19 | -10.50 | 8.4E-18 | -15.43                    | 4.3E-25 | -18.17   | 1.3E-42 | -5.56 | 2.7E-08 | -7.99                   | 1.3E-15 | -8.97    | 2.8E-19 |
|                      | Mean Z | -5.46                   | 5.0E-08 | -7.48   | 9.3E-14 | -8.77    | 2.1E-18 | -10.26 | 2.8E-17 | -10.80                    | 1.3E-16 | -14.77   | 2.5E-32 | -5.46 | 4.7E-08 | -7.48                   | 7.3E-14 | -8.77    | 1.7E-18 |
| Sensitivity          | Min    | 0.16                    | 8.7E-01 | 2.73    | 6.4E-03 | 0.63     | 5.3E-01 | 0.56   | 5.8E-01 | 3.02                      | 3.6E-03 | 1.97     | 5.0E-02 | 0.16  | 8.7E-01 | 2.73                    | 6.3E-03 | 0.63     | 5.3E-01 |
|                      | Max    | 0.20                    | 8.4E-01 | 2.37    | 1.8E-02 | 0.42     | 6.8E-01 | 0.70   | 4.9E-01 | 1.77                      | 8.2E-02 | 1.34     | 1.8E-01 | 0.20  | 8.4E-01 | 2.37                    | 1.8E-02 | 0.42     | 6.8E-01 |
|                      | Mean   | 0.41                    | 6.8E-01 | 3.13    | 1.7E-03 | 0.80     | 4.2E-01 | 1.30   | 2.0E-01 | 2.32                      | 2.3E-02 | 2.26     | 2.5E-02 | 0.41  | 6.8E-01 | 3.13                    | 1.7E-03 | 0.80     | 4.2E-01 |
|                      | Min Z  | 2.79                    | 5.4E-03 | 6.83    | 9.7E-12 | 5.68     | 1.4E-08 | 1.84   | 7.0E-02 | 3.90                      | 2.3E-04 | 3.70     | 3.0E-04 | 2.79  | 5.3E-03 | 6.83                    | 8.2E-12 | 5.68     | 1.3E-08 |
|                      | Max Z  | 6.30                    | 3.3E-10 | 5.92    | 3.5E-09 | 8.58     | 1.2E-17 | 3.91   | 1.8E-04 | 3.36                      | 1.3E-03 | 5.16     | 7.5E-07 | 6.30  | 3.0E-10 | 5.92                    | 3.2E-09 | 8.58     | 9.7E-18 |
|                      | Mean Z | 5.22                    | 1.9E-07 | 8.34    | 1.1E-16 | 8.55     | 1.5E-17 | 3.55   | 6.2E-04 | 4.58                      | 2.2E-05 | 5.55     | 1.2E-07 | 5.22  | 1.8E-07 | 8.34                    | 7.7E-17 | 8.55     | 1.3E-17 |
| Mechanical Stiffness | Min    | 1.26                    | 2.1E-01 | -2.82   | 4.8E-03 | -1.14    | 2.5E-01 | 1.14   | 2.6E-01 | -3.39                     | 1.2E-03 | -1.19    | 2.4E-01 | 1.26  | 2.1E-01 | -2.82                   | 4.8E-03 | -1.14    | 2.5E-01 |
|                      | Max    | 2.83                    | 4.7E-03 | -2.43   | 1.5E-02 | 0.17     | 8.6E-01 | 2.60   | 1.1E-02 | -2.88                     | 5.4E-03 | 0.18     | 8.6E-01 | 2.83  | 4.6E-03 | -2.43                   | 1.5E-02 | 0.17     | 8.6E-01 |
|                      | Mean   | 2.08                    | 3.7E-02 | -2.55   | 1.1E-02 | -0.40    | 6.9E-01 | 1.92   | 5.8E-02 | -3.03                     | 3.4E-03 | -0.42    | 6.7E-01 | 2.08  | 3.7E-02 | -2.55                   | 1.1E-02 | -0.40    | 6.9E-01 |
|                      | Min Z  | -7.80                   | 7.9E-15 | -5.47   | 5.0E-08 | -9.52    | 2.3E-21 | -5.00  | 3.0E-06 | -3.41                     | 1.1E-03 | -6.04    | 1.1E-08 | -7.80 | 6.4E-15 | -5.47                   | 4.6E-08 | -9.52    | 1.8E-21 |
|                      | Max Z  | -1.54                   | 1.2E-01 | -3.33   | 8.8E-04 | -3.23    | 1.2E-03 | -1.14  | 2.6E-01 | -2.01                     | 4.8E-02 | -2.22    | 2.8E-02 | -1.54 | 1.2E-01 | -3.33                   | 8.7E-04 | -3.23    | 1.2E-03 |
|                      | Mean Z | -5.52                   | 3.7E-08 | -5.59   | 2.4E-08 | -7.64    | 2.4E-14 | -3.56  | 5.9E-04 | -2.96                     | 4.3E-03 | -4.63    | 7.6E-06 | -5.52 | 3.5E-08 | -5.59                   | 2.2E-08 | -7.64    | 2.1E-14 |
| MSF                  | Min    | 3.09                    | 2.0E-03 | 3.14    | 1.7E-03 | 4.23     | 2.4E-05 | 2.22   | 2.9E-02 | 4.39                      | 3.9E-05 | 3.37     | 9.4E-04 | 3.09  | 2.0E-03 | 3.14                    | 1.7E-03 | 4.23     | 2.3E-05 |
|                      | Max    | 5.32                    | 1.1E-07 | 4.41    | 1.1E-05 | 6.68     | 2.6E-11 | 3.21   | 1.8E-03 | 3.99                      | 1.6E-04 | 4.23     | 4.0E-05 | 5.32  | 1.0E-07 | 4.41                    | 1.0E-05 | 6.68     | 2.4E-11 |



|                   |           |               |             |               |             |               |             |                |             |                |             |                |              |               |             |               |             |               |             |
|-------------------|-----------|---------------|-------------|---------------|-------------|---------------|-------------|----------------|-------------|----------------|-------------|----------------|--------------|---------------|-------------|---------------|-------------|---------------|-------------|
|                   | Mea<br>n  | 5.0<br>5      | 4.6E-<br>07 | 4.3<br>8      | 1.2E-<br>05 | 6.4<br>6      | 1.1E-<br>10 | 3.16           | 2.2E-<br>03 | 4.61           | 1.8E-<br>05 | 4.32           | 2.7E-<br>05  | 5.0<br>5      | 4.5E-<br>07 | 4.3<br>8      | 1.2E-<br>05 | 6.4<br>6      | 1.0E-<br>10 |
|                   | Min<br>Z  | 4.7<br>8      | 1.8E-<br>06 | 8.3<br>8      | 7.8E-<br>17 | 8.2<br>8      | 1.4E-<br>16 | 3.88           | 2.0E-<br>04 | 5.52           | 6.0E-<br>07 | 6.44           | 1.4E-<br>09  | 4.7<br>8      | 1.7E-<br>06 | 8.3<br>8      | 5.4E-<br>17 | 8.2<br>8      | 1.2E-<br>16 |
|                   | Max<br>Z  | 7.2<br>9      | 3.7E-<br>13 | 6.6<br>8      | 2.8E-<br>11 | 9.7<br>1      | 3.8E-<br>22 | 5.55           | 3.0E-<br>07 | 4.12           | 1.1E-<br>04 | 6.87           | 1.5E-<br>10  | 7.2<br>9      | 3.2E-<br>13 | 6.6<br>8      | 2.4E-<br>11 | 9.7<br>1      | 2.8E-<br>22 |
|                   | Mea<br>nZ | 7.5<br>5      | 5.2E-<br>14 | 9.6<br>9      | 6.3E-<br>22 | 11.<br>22     | 5.6E-<br>29 | 5.54           | 3.1E-<br>07 | 5.31           | 1.4E-<br>06 | 7.60           | 2.6E-<br>12  | 7.5<br>5      | 4.3E-<br>14 | 9.6<br>9      | 3.3E-<br>22 | 11.<br>22     | 3.3E-<br>29 |
| MSF (Local Modes) | Min       | -<br>0.8<br>4 | 4.0E-<br>01 | -<br>0.9<br>5 | 3.4E-<br>01 | -<br>1.2<br>3 | 2.2E-<br>01 | -<br>5.89      | 4.0E-<br>09 | -<br>6.19      | 7.4E-<br>10 | -<br>8.40      | 5.3E-<br>17  | -<br>0.8<br>4 | 4.0E-<br>01 | -<br>0.9<br>5 | 3.4E-<br>01 | -<br>1.2<br>3 | 2.2E-<br>01 |
|                   | Max       | -<br>2.8<br>3 | 4.7E-<br>03 | -<br>4.2<br>2 | 2.5E-<br>05 | -<br>4.9<br>5 | 7.5E-<br>07 | -<br>18.9<br>3 | 9.1E-<br>76 | -<br>24.2<br>7 | 9.8E-<br>88 | -<br>29.7<br>6 | 1.4E-<br>157 | -<br>2.8<br>3 | 4.6E-<br>03 | -<br>4.2<br>2 | 2.4E-<br>05 | -<br>4.9<br>5 | 7.4E-<br>07 |
|                   | Mea<br>n  | -<br>2.4<br>7 | 1.4E-<br>02 | -<br>3.3<br>2 | 9.2E-<br>04 | -<br>4.0<br>8 | 4.6E-<br>05 | -<br>16.7<br>5 | 8.9E-<br>61 | -<br>13.1<br>8 | 3.4E-<br>26 | -<br>19.3<br>9 | 7.9E-<br>63  | -<br>2.4<br>7 | 1.4E-<br>02 | -<br>3.3<br>2 | 9.1E-<br>04 | -<br>4.0<br>8 | 4.5E-<br>05 |
|                   | Min<br>Z  | -<br>1.3<br>6 | 1.7E-<br>01 | -<br>1.1<br>8 | 2.4E-<br>01 | -<br>1.7<br>8 | 7.5E-<br>02 | -<br>7.07      | 7.2E-<br>12 | -<br>2.47      | 1.6E-<br>02 | -<br>5.90      | 1.2E-<br>08  | -<br>1.3<br>6 | 1.7E-<br>01 | -<br>1.1<br>8 | 2.4E-<br>01 | -<br>1.7<br>8 | 7.5E-<br>02 |
|                   | Max<br>Z  | -<br>2.9<br>2 | 3.5E-<br>03 | -<br>4.3<br>6 | 1.4E-<br>05 | -<br>5.1<br>2 | 3.1E-<br>07 | -<br>19.6<br>7 | 8.6E-<br>82 | -<br>22.6<br>1 | 1.5E-<br>66 | -<br>29.0<br>2 | 1.6E-<br>138 | -<br>2.9<br>2 | 3.5E-<br>03 | -<br>4.3<br>6 | 1.3E-<br>05 | -<br>5.1<br>2 | 3.1E-<br>07 |
|                   | Mea<br>nZ | -<br>2.6<br>6 | 7.9E-<br>03 | -<br>3.4<br>5 | 5.6E-<br>04 | -<br>4.2<br>7 | 1.9E-<br>05 | -<br>17.4<br>6 | 1.5E-<br>64 | -<br>11.0<br>0 | 4.9E-<br>19 | -<br>17.8<br>7 | 1.8E-<br>51  | -<br>2.6<br>6 | 7.8E-<br>03 | -<br>3.4<br>5 | 5.5E-<br>04 | -<br>4.2<br>7 | 1.9E-<br>05 |
| ESSA              | Min       | -<br>0.1<br>4 | 8.9E-<br>01 | 1.5<br>6      | 1.2E-<br>01 | 0.7<br>7      | 4.4E-<br>01 | -<br>0.11      | 9.1E-<br>01 | 1.29           | 2.0E-<br>01 | 0.62           | 5.4E-<br>01  | -<br>0.1<br>4 | 8.9E-<br>01 | 1.5<br>6      | 1.2E-<br>01 | 0.7<br>7      | 4.4E-<br>01 |
|                   | Max       | 1.0<br>0      | 3.2E-<br>01 | 0.5<br>6      | 5.8E-<br>01 | 1.1<br>2      | 2.6E-<br>01 | 0.78           | 4.4E-<br>01 | 0.39           | 7.0E-<br>01 | 0.85           | 4.0E-<br>01  | 1.0<br>0      | 3.2E-<br>01 | 0.5<br>6      | 5.8E-<br>01 | 1.1<br>2      | 2.6E-<br>01 |
|                   | Mea<br>n  | 0.4<br>1      | 6.8E-<br>01 | 1.8<br>0      | 7.2E-<br>02 | 1.2<br>8      | 2.0E-<br>01 | 0.32           | 7.5E-<br>01 | 1.06           | 2.9E-<br>01 | 0.91           | 3.6E-<br>01  | 0.4<br>1      | 6.8E-<br>01 | 1.8<br>0      | 7.2E-<br>02 | 1.2<br>8      | 2.0E-<br>01 |
|                   | Min<br>Z  | -<br>0.1<br>4 | 8.9E-<br>01 | 1.5<br>6      | 1.2E-<br>01 | 0.7<br>7      | 4.4E-<br>01 | -<br>0.11      | 9.1E-<br>01 | 1.29           | 2.0E-<br>01 | 0.62           | 5.4E-<br>01  | -<br>0.1<br>4 | 8.9E-<br>01 | 1.5<br>6      | 1.2E-<br>01 | 0.7<br>7      | 4.4E-<br>01 |
|                   | Max<br>Z  | 1.0<br>0      | 3.2E-<br>01 | 0.5<br>6      | 5.8E-<br>01 | 1.1<br>2      | 2.6E-<br>01 | 0.78           | 4.4E-<br>01 | 0.39           | 7.0E-<br>01 | 0.85           | 4.0E-<br>01  | 1.0<br>0      | 3.2E-<br>01 | 0.5<br>6      | 5.8E-<br>01 | 1.1<br>2      | 2.6E-<br>01 |
|                   | Mea<br>nZ | 0.4<br>1      | 6.8E-<br>01 | 1.8<br>0      | 7.2E-<br>02 | 1.2<br>8      | 2.0E-<br>01 | 0.32           | 7.5E-<br>01 | 1.06           | 2.9E-<br>01 | 0.91           | 3.6E-<br>01  | 0.4<br>1      | 6.8E-<br>01 | 1.8<br>0      | 7.2E-<br>02 | 1.2<br>8      | 2.0E-<br>01 |

\*t stands for t-statistics and p stands for p-value

**Table S3.** 5-fold and 10-fold cross-validation results of the proposed PU-learning classifiers

| Dataset (feature set)     | 5-fold CV     |                   | 10-fold CV    |                   |
|---------------------------|---------------|-------------------|---------------|-------------------|
|                           | Recall (%)    | Fall-out Rate (%) | Recall (%)    | Fall-out Rate (%) |
| Loop (ProDy)              | 76.24 ± 12.62 | 17.48 ± 1.68      | 78.04 ± 13.62 | 17.00 ± 2.01      |
| Loop (Profound)           | 81.84 ± 9.06  | 14.50 ± 1.44      | 82.19 ± 13.03 | 14.19 ± 1.88      |
| Loop (ProDy+Profound)     | 84.01 ± 8.27  | 16.06 ± 1.66      | 86.76 ± 10.96 | 16.08 ± 1.79      |
| Non-loop (ProDy)          | 82.70 ± 9.72  | 21.62 ± 1.98      | 83.81 ± 13.12 | 21.09 ± 2.44      |
| Non-loop (Profound)       | 84.88 ± 11.19 | 20.76 ± 1.87      | 86.60 ± 12.79 | 20.61 ± 2.30      |
| Non-loop (ProDy+Profound) | 86.76 ± 9.24  | 19.98 ± 1.90      | 88.33 ± 12.01 | 19.94 ± 2.24      |
| Combined (ProDy)          | 73.92 ± 6.29  | 19.94 ± 1.39      | 78.05 ± 9.93  | 19.75 ± 1.54      |
| Combined (Profound)       | 80.42 ± 7.80  | 15.87 ± 1.50      | 81.00 ± 10.03 | 15.40 ± 1.30      |
| Combined (ProDy+Profound) | 82.79 ± 6.45  | 18.87 ± 1.46      | 84.26 ± 9.19  | 18.26 ± 1.39      |

**Table S4.** Percentage contribution of individual feature sets to foldability classification

| Feature Set                            | ProDy Features (%) |         |          | ProDy + Profound Features (%) |         |          |
|----------------------------------------|--------------------|---------|----------|-------------------------------|---------|----------|
|                                        | Loop               | Nonloop | Combined | Loop                          | Nonloop | Combined |
| Effectiveness                          | 15.63              | 26.23   | 19.67    | 12.00                         | 20.09   | 14.98    |
| Sensitivity                            | 18.42              | 12.79   | 17.40    | 13.29                         | 11.30   | 12.00    |
| Mechanical Stiffness                   | 11.78              | 10.61   | 12.16    | 8.25                          | 6.98    | 7.42     |
| MSF (Global Modes)                     | 19.93              | 26.99   | 19.48    | 13.92                         | 21.61   | 15.92    |
| MSF (Local Modes)                      | 23.53              | 16.27   | 20.95    | 15.75                         | 13.92   | 15.54    |
| ESSA                                   | 9.96               | 6.45    | 9.40     | 6.36                          | 4.45    | 5.87     |
| Hinge                                  | 0.75               | 0.66    | 0.96     | 0.52                          | 0.54    | 0.58     |
| Deletion site properties (Profound)    | -                  | -       | -        | 20.43                         | 15.86   | 19.02    |
| Environmental Compatibility (Profound) | -                  | -       | -        | 7.93                          | 3.08    | 6.11     |
| Folding free energy (Profound)         | -                  | -       | -        | 1.55                          | 2.16    | 2.56     |

**Table S5.** Percentage contribution of individual features to foldability classification

|                      | Features       | ProDy Features (%) |         |          | ProDy + Profound Features (%) |         |          |
|----------------------|----------------|--------------------|---------|----------|-------------------------------|---------|----------|
|                      |                | Loop               | Nonloop | Combined | Loop                          | Nonloop | Combined |
| Effectiveness        | Minimum        | 3.57               | 1.31    | 2.23     | 2.45                          | 0.92    | 1.58     |
|                      | Maximum        | 1.90               | 2.42    | 2.22     | 1.35                          | 2.28    | 1.52     |
|                      | Mean           | 2.14               | 2.04    | 2.17     | 1.60                          | 2.09    | 1.60     |
|                      | Minimum ZScore | 1.86               | 1.13    | 1.87     | 1.42                          | 0.89    | 1.18     |
|                      | Maximum ZScore | 2.85               | 10.24   | 5.55     | 2.53                          | 7.34    | 4.53     |
|                      | <Z>            | 3.31               | 9.09    | 5.62     | 2.67                          | 6.56    | 4.58     |
| Sensitivity          | Minimum        | 3.59               | 5.50    | 4.94     | 2.62                          | 4.52    | 3.63     |
|                      | Maximum        | 2.66               | 1.08    | 2.35     | 2.11                          | 0.91    | 1.40     |
|                      | Mean           | 2.86               | 1.66    | 2.68     | 2.23                          | 1.70    | 1.99     |
|                      | Minimum ZScore | 4.73               | 1.82    | 3.07     | 3.07                          | 1.76    | 2.20     |
|                      | Maximum ZScore | 2.39               | 1.25    | 2.18     | 1.69                          | 0.95    | 1.34     |
|                      | <Z>            | 2.19               | 1.49    | 2.19     | 1.57                          | 1.45    | 1.43     |
| Stiffness            | Minimum        | 1.54               | 1.79    | 1.63     | 1.10                          | 1.13    | 0.98     |
|                      | Maximum        | 1.70               | 1.68    | 1.64     | 1.30                          | 1.09    | 1.00     |
|                      | Mean           | 1.63               | 1.72    | 1.61     | 1.19                          | 1.11    | 0.98     |
|                      | Minimum ZScore | 3.30               | 1.20    | 2.52     | 2.21                          | 0.85    | 1.60     |
|                      | Maximum ZScore | 1.64               | 2.57    | 2.32     | 1.03                          | 1.56    | 1.35     |
|                      | <Z>            | 1.97               | 1.65    | 2.44     | 1.40                          | 1.24    | 1.52     |
| MSFs in global modes | Minimum        | 1.72               | 8.42    | 2.67     | 1.19                          | 6.21    | 2.40     |
|                      | Maximum        | 2.56               | 2.34    | 2.99     | 1.73                          | 2.03    | 2.14     |
|                      | Mean           | 2.20               | 5.69    | 3.47     | 1.64                          | 4.67    | 2.87     |
|                      | Minimum ZScore | 3.53               | 5.36    | 3.25     | 2.95                          | 4.38    | 3.15     |
|                      | Maximum ZScore | 3.89               | 1.65    | 2.60     | 2.40                          | 1.31    | 1.84     |
|                      | <Z>            | 6.03               | 3.53    | 4.49     | 4.01                          | 3.01    | 3.52     |
|                      | Hinge          | 0.75               | 0.66    | 0.96     | 0.52                          | 0.54    | 0.58     |
| MSFs in local modes  | Minimum        | 2.36               | 3.21    | 3.04     | 1.77                          | 3.28    | 2.48     |
|                      | Maximum        | 2.39               | 3.26    | 3.05     | 1.73                          | 2.53    | 2.13     |
|                      | Mean           | 3.10               | 1.24    | 2.66     | 2.04                          | 0.81    | 1.69     |
|                      | Minimum ZScore | 7.09               | 3.76    | 5.18     | 4.73                          | 3.66    | 4.08     |
|                      | Maximum ZScore | 6.85               | 3.50    | 5.32     | 4.38                          | 2.80    | 4.14     |
|                      | <Z>            | 1.74               | 1.30    | 1.69     | 1.10                          | 0.84    | 1.01     |
| Essentiality         | Minimum        | 1.90               | 1.29    | 1.92     | 1.27                          | 0.87    | 1.19     |
|                      | Maximum        | 2.11               | 1.22    | 1.83     | 1.32                          | 0.84    | 1.17     |
|                      | Mean           | 1.74               | 1.31    | 1.69     | 1.10                          | 0.85    | 1.02     |
|                      | Minimum ZScore | 1.93               | 1.29    | 1.91     | 1.26                          | 0.87    | 1.19     |

|                                          | Maxi ZScore | 2.12 | 1.20 | 1.83 | 1.31 | 0.83 | 1.17 |
|------------------------------------------|-------------|------|------|------|------|------|------|
|                                          | <Z>         | 0.16 | 0.14 | 0.20 | 0.10 | 0.18 | 0.13 |
| End to end distance                      | -           | -    | -    | 1.36 | 2.07 | 1.79 |      |
| Salt bridge in deleted region            | -           | -    | -    | 0.16 | 0.15 | 0.17 |      |
| Disulphide bonds in deleted region       | -           | -    | -    | 0.04 | 0.03 | 0.04 |      |
| Hbond bonds in deleted region            | -           | -    | -    | 0.86 | 1.96 | 1.04 |      |
| Maximum phi angle in deleted region      | -           | -    | -    | 1.12 | 0.78 | 1.05 |      |
| Minimum phi angle in deleted region      | -           | -    | -    | 1.19 | 0.98 | 1.34 |      |
| Maximum psi angle in deleted region      | -           | -    | -    | 1.22 | 0.97 | 1.49 |      |
| Minimum psi angle in deleted region      | -           | -    | -    | 1.22 | 0.83 | 1.44 |      |
| Mean surface area                        | -           | -    | -    | 2.86 | 1.52 | 1.96 |      |
| SD* surface area                         | -           | -    | -    | 0.34 | 0.26 | 0.33 |      |
| Avg. loop propensity                     | -           | -    | -    | 0.98 | -    | -    |      |
| SD loop propensity                       | -           | -    | -    | 0.44 | -    | -    |      |
| ALA propensity                           | -           | -    | -    | 0.61 | 0.94 | 1.25 |      |
| CYS propensity                           | -           | -    | -    | 0.11 | 0.10 | 0.12 |      |
| ASP propensity                           | -           | -    | -    | 0.56 | 0.28 | 0.50 |      |
| GLU propensity                           | -           | -    | -    | 0.31 | 0.51 | 0.50 |      |
| PHE propensity                           | -           | -    | -    | 0.24 | 0.26 | 0.28 |      |
| GLY propensity                           | -           | -    | -    | 0.98 | 0.40 | 0.73 |      |
| HIS propensity                           | -           | -    | -    | 0.20 | 0.21 | 0.23 |      |
| ILE propensity                           | -           | -    | -    | 0.20 | 0.31 | 0.27 |      |
| LYS propensity                           | -           | -    | -    | 0.29 | 0.34 | 0.34 |      |
| LEU propensity                           | -           | -    | -    | 0.81 | 0.41 | 0.57 |      |
| MET propensity                           | -           | -    | -    | 0.13 | 0.14 | 0.14 |      |
| ASN propensity                           | -           | -    | -    | 1.61 | 0.26 | 0.75 |      |
| PRO propensity                           | -           | -    | -    | 0.40 | 0.34 | 0.47 |      |
| GLN propensity                           | -           | -    | -    | 0.39 | 0.24 | 0.36 |      |
| ARG propensity                           | -           | -    | -    | 0.26 | 0.30 | 0.32 |      |
| SER propensity                           | -           | -    | -    | 0.57 | 0.27 | 0.43 |      |
| THR propensity                           | -           | -    | -    | 0.34 | 0.27 | 0.34 |      |
| VAL propensity                           | -           | -    | -    | 0.31 | 0.36 | 0.42 |      |
| TRP propensity                           | -           | -    | -    | 0.09 | 0.11 | 0.11 |      |
| TYR propensity                           | -           | -    | -    | 0.23 | 0.24 | 0.23 |      |
| Weighted Contact Number mean             | -           | -    | -    | 0.19 | 0.26 | 0.23 |      |
| Weighted Contact Number SD               | -           | -    | -    | 0.05 | 0.09 | 0.05 |      |
| Weighted Hydrophobic Contact Number mean | -           | -    | -    | 0.42 | 0.40 | 0.47 |      |
| Weighted Hydrophobic Contact Number SD   | -           | -    | -    | 0.23 | 0.26 | 0.24 |      |
| Salt bridge between subunits             | -           | -    | -    | 0.56 | 0.30 | 0.51 |      |
| Disulphide between subunits              | -           | -    | -    | 0.16 | 0.08 | 0.10 |      |
| Size N terminal                          | -           | -    | -    | 2.01 | 0.78 | 1.63 |      |

|                        |   |   |   |      |      |      |
|------------------------|---|---|---|------|------|------|
| <b>Size C terminal</b> | - | - | - | 4.31 | 0.91 | 2.87 |
| <b>Total FoldX</b>     | - | - | - | 1.56 | 2.16 | 2.56 |

\*SD stands for standard deviation

**Table S6.** Native and mutant protein pairs in the positive mAA-del database and their existence as monomers

| PDB ID# | Chain | ORGANISM          | MOLECULE                                             | MONOMERIC/ MULTIMERIC*                                               |
|---------|-------|-------------------|------------------------------------------------------|----------------------------------------------------------------------|
| 1M3C    | A     | MUS MUSCULUS      | PROTO-ONCOGENE C-CRK                                 | Biological unit of either native or mutant is monomer in the PDB     |
| 1M3B    | A     | MUS MUSCULUS      | PROTO-ONCOGENE C-CRK                                 |                                                                      |
| 1O1M    | A     | HOMO SAPIENS      | HEMOGLOBIN ALPHA CHAIN                               | <u>Native can exist as monomer LINK</u>                              |
| 1O1J    | A     | HOMO SAPIENS      | HEMOGLOBIN ALPHA CHAIN                               |                                                                      |
| 1XV8    | B     | HOMO SAPIENS      | ALPHA-AMYLASE                                        | Interaction subunit of either native or mutant is monomer in Uniprot |
| 1JXK    | A     | HOMO SAPIENS      | ALPHA-AMYLASE, SALIVARY                              |                                                                      |
| 2EE5    | A     | HOMO SAPIENS      | RHO GTPASE ACTIVATING PROTEIN 5 VARIANT              | Biological unit of either native or mutant is monomer in the PDB     |
| 2EE4    | A     | HOMO SAPIENS      | RHO GTPASE ACTIVATING PROTEIN 5 VARIANT              |                                                                      |
| 2ESW    | A     | MUS MUSCULUS      | RHO GUANINE NUCLEOTIDE EXCHANGE FACTOR 7             | Biological unit of either native or mutant is monomer in the PDB     |
| 2G6F    | X     | RATTUS NORVEGICUS | RHO GUANINE NUCLEOTIDE EXCHANGE FACTOR 7             |                                                                      |
| 2GBJ    | B     | HOMO SAPIENS      | UBIQUITIN                                            | Biological unit of either native or mutant is monomer in the PDB     |
| 1S1Q    | D     | HOMO SAPIENS      | UBIQUITIN                                            |                                                                      |
| 2GBJ    | B     | HOMO SAPIENS      | UBIQUITIN                                            | Biological unit of either native or mutant is monomer in the PDB     |
| 4MDK    | F     | HOMO SAPIENS      | UBIQUITIN                                            |                                                                      |
| 2GQG    | B     | HOMO SAPIENS      | PROTO-ONCOGENE TYROSINE-PROTEIN KINASE ABL1          | Biological unit of either native or mutant is monomer in the PDB     |
| 2HIW    | B     | HOMO SAPIENS      | PROTO-ONCOGENE TYROSINE-PROTEIN KINASE ABL1          |                                                                      |
| 2MD5    | A     | MUS MUSCULUS      | TRANSCRIPTION FACTOR ETV6                            | Biological unit of either native or mutant is monomer in the PDB     |
| 2LF8    | A     | MUS MUSCULUS      | TRANSCRIPTION FACTOR ETV6                            |                                                                      |
| 2UWA    | A     | TROPAEOLUM MAJUS  | CELLULASE                                            | Biological unit of either native or mutant is monomer in the PDB     |
| 2VH9    | B     | TROPAEOLUM MAJUS  | CELLULASE                                            |                                                                      |
| 2YRY    | A     | HOMO SAPIENS      | COMPND 3 MEMBER 6                                    | Biological unit of either native or mutant is monomer in the PDB     |
| 2D9Y    | A     | HOMO SAPIENS      | COMPND 3 FAMILY A MEMBER 6                           |                                                                      |
| 2YT1    | A     | MUS MUSCULUS      | COMPND 3 PRECURSOR PROTEIN-BINDING FAMILY B MEMBER 2 | Biological unit of either native or mutant is monomer in the PDB     |
| 2YT0    | A     | MUS MUSCULUS      | COMPND 3 PRECURSOR PROTEIN-BINDING FAMILY B MEMBER 2 |                                                                      |
| 2Z24    | A     | ESCHERICHIA COLI  | DIHYDROOROTASE                                       | <u>Can exist both as monomer and dimer LINK</u>                      |
| 2Z2B    | A     | ESCHERICHIA COLI  | DIHYDROOROTASE                                       |                                                                      |
| 2E25    | A     | ESCHERICHIA COLI  | DIHYDROOROTASE                                       | <u>Can exist both as monomer and dimer LINK</u>                      |
| 2Z2B    | A     | ESCHERICHIA COLI  | DIHYDROOROTASE                                       |                                                                      |
| 1XGE    | A     | ESCHERICHIA COLI  | DIHYDROOROTASE                                       | <u>Can exist both as monomer and dimer LINK</u>                      |
| 2Z2B    | A     | ESCHERICHIA COLI  | DIHYDROOROTASE                                       |                                                                      |

|      |   |                                             |                                       |                                                                  |
|------|---|---------------------------------------------|---------------------------------------|------------------------------------------------------------------|
| 2Z28 | A | ESCHERICHIA COLI                            | DIHYDROOROTASE                        | <a href="#">Can exist both as monomer and dimer LINK</a>         |
| 2Z2B | A | ESCHERICHIA COLI                            | DIHYDROOROTASE                        |                                                                  |
| 2Z25 | A | ESCHERICHIA COLI                            | DIHYDROOROTASE                        | <a href="#">Can exist both as monomer and dimer LINK</a>         |
| 2Z2B | A | ESCHERICHIA COLI                            | DIHYDROOROTASE                        |                                                                  |
| 2Z29 | A | ESCHERICHIA COLI                            | DIHYDROOROTASE                        | <a href="#">Can exist both as monomer and dimer LINK</a>         |
| 2Z2B | A | ESCHERICHIA COLI                            | DIHYDROOROTASE                        |                                                                  |
| 2Z2A | A | ESCHERICHIA COLI                            | DIHYDROOROTASE                        | <a href="#">Can exist both as monomer and dimer LINK</a>         |
| 2Z2B | A | ESCHERICHIA COLI                            | DIHYDROOROTASE                        |                                                                  |
| 2Z26 | A | ESCHERICHIA COLI                            | DIHYDROOROTASE                        | <a href="#">Can exist both as monomer and dimer LINK</a>         |
| 2Z2B | A | ESCHERICHIA COLI                            | DIHYDROOROTASE                        |                                                                  |
| 1KNB | A | HUMAN ADENOVIRUS 5                          | ADENOVIRUS TYPE 5 FIBER PROTEIN       | Exists as trimer                                                 |
| 4ATZ | A | UNIDENTIFIED ADENOVIRUS                     | FIBER PROTEIN                         |                                                                  |
| 2VX9 | A | HALOBACTERIUM SALINARUM R1                  | DODECIN                               | Exists as dodecamer                                              |
| 4B2H | A | HALOBACTERIUM SALINARUM                     | DODECIN                               |                                                                  |
| 1PWK | A | RATTUS NORVEGICUS                           | DYNEIN LIGHT CHAIN-2                  | Biological unit of either native or mutant is monomer in the PDB |
| 4D07 | A | HOMO SAPIENS                                | DYNEIN LIGHT CHAIN 2, CYTOPLASMIC     |                                                                  |
| 4G79 | A | CAENORHABDITIS ELEGANS                      | SPINDLE ASSEMBLY ABNORMAL PROTEIN 6   | <a href="#">Native can exist as monomer LINK</a>                 |
| 4GFA | C | CAENORHABDITIS ELEGANS                      | SPINDLE ASSEMBLY ABNORMAL PROTEIN 6   |                                                                  |
| 2N69 | A | PENTADIPLANDRA BRAZZEANA                    | DEFENSIN-LIKE PROTEIN                 | Biological unit of either native or mutant is monomer in the PDB |
| 4HE7 | A | PENTADIPLANDRA BRAZZEANA                    | DEFENSIN-LIKE PROTEIN                 |                                                                  |
| 4NUP | C | MUS MUSCULUS                                | N-CADHERIN EC1-2                      | Biological unit of either native or mutant is monomer in the PDB |
| 2QVI | A | MUS MUSCULUS                                | CADHERIN-2                            |                                                                  |
| 3IWI | B | ESCHERICHIA COLI                            | BETA-LACTAMASE                        | Biological unit of either native or mutant is monomer in the PDB |
| 4OLG | B | ESCHERICHIA COLI                            | BETA-LACTAMASE                        |                                                                  |
| 4F01 | B | ESCHERICHIA COLI                            | CHAPERONE PROTEIN DNAK                | Biological unit of either native or mutant is monomer in the PDB |
| 4R5I | A | ESCHERICHIA COLI                            | CHAPERONE PROTEIN DNAK                |                                                                  |
| 4R5L | D | ESCHERICHIA COLI                            | CHAPERONE PROTEIN DNAK                | <a href="#">Native can exist as monomer LINK</a>                 |
| 4R5J | D | ESCHERICHIA COLI                            | CHAPERONE PROTEIN DNAK                |                                                                  |
| 2X6W | A | ENTEROBACTERIA PHAGE HK620                  | TAIL SPIKE PROTEIN                    | Exists as a trimer                                               |
| 4XQI | A | ENTEROBACTERIA PHAGE HK620                  | TAIL SPIKE PROTEIN                    |                                                                  |
| 1IP2 | A | HOMO SAPIENS                                | LYSOZYME C                            | Biological unit of either native or mutant is monomer in the PDB |
| 1DI4 | A | HOMO SAPIENS                                | LYSOZYME C                            |                                                                  |
| 1LHL | A | HOMO SAPIENS                                | HUMAN LYSOZYME                        | Biological unit of either native or mutant is monomer in the PDB |
| 1DI4 | A | HOMO SAPIENS                                | LYSOZYME C                            |                                                                  |
| 1FRS | B | ENTEROBACTERIA PHAGE FR                     | BACTERIOPHAGE FR CAPSID               | Exists as a trimer                                               |
| 1FR5 | C | ENTEROBACTERIA PHAGE FR                     | BACTERIOPHAGE FR CAPSID               |                                                                  |
| 3LI0 | A | METHANOTHERMOBACTER THERMAUTOTROPHICUS      | OROTIDINE 5'-PHOSPHATE DECARBOXYLASE  | <a href="#">Native can exist as monomer LINK</a>                 |
| 1LOS | D | METHANOTHERMOBACTER                         | OROTIDINE MONOPHOSPHATE DECARBOXYLASE |                                                                  |
| 4FX8 | B | METHANOTHERMOBACTER THERMAUTOTROPHICUS STR. | OROTIDINE 5'-PHOSPHATE DECARBOXYLASE  | <a href="#">Native can exist as monomer LINK</a>                 |
| 1LOS | D | METHANOTHERMOBACTER                         | OROTIDINE MONOPHOSPHATE DECARBOXYLASE |                                                                  |

|      |   |                       |                                            |                                                                  |
|------|---|-----------------------|--------------------------------------------|------------------------------------------------------------------|
| 1LZ5 | A | HOMO SAPIENS          | HUMAN LYSOZYME                             | Biological unit of either native or mutant is monomer in the PDB |
| 1B7S | A | HOMO SAPIENS          | LYSOZYME                                   |                                                                  |
| 1LZ6 | A | HOMO SAPIENS          | HUMAN LYSOZYME                             | Biological unit of either native or mutant is monomer in the PDB |
| 1OUH | A | HOMO SAPIENS          | LYSOZYME                                   |                                                                  |
| 1SYG | A | STAPHYLOCOCCUS AUREUS | STAPHYLOCOCCAL NUCLEASE                    | Biological unit of either native or mutant is monomer in the PDB |
| 1SND | B | STAPHYLOCOCCUS AUREUS | STAPHYLOCOCCAL NUCLEASE DIMER              |                                                                  |
| 1SYE | A | STAPHYLOCOCCUS AUREUS | STAPHYLOCOCCAL NUCLEASE                    | Biological unit of either native or mutant is monomer in the PDB |
| 1SND | B | STAPHYLOCOCCUS AUREUS | STAPHYLOCOCCAL NUCLEASE DIMER              |                                                                  |
| 1F2Z | A | STAPHYLOCOCCUS AUREUS | STAPHYLOCOCCAL NUCLEASE                    | Biological unit of either native or mutant is monomer in the PDB |
| 1SND | B | STAPHYLOCOCCUS AUREUS | STAPHYLOCOCCAL NUCLEASE DIMER              |                                                                  |
| 1SYC | A | STAPHYLOCOCCUS AUREUS | STAPHYLOCOCCAL NUCLEASE                    | Biological unit of either native or mutant is monomer in the PDB |
| 1SND | B | STAPHYLOCOCCUS AUREUS | STAPHYLOCOCCAL NUCLEASE DIMER              |                                                                  |
| 1KDC | A | STAPHYLOCOCCUS AUREUS | STAPHYLOCOCCAL NUCLEASE                    | Biological unit of either native or mutant is monomer in the PDB |
| 1SND | B | STAPHYLOCOCCUS AUREUS | STAPHYLOCOCCAL NUCLEASE DIMER              |                                                                  |
| 1F2M | A | STAPHYLOCOCCUS AUREUS | STAPHYLOCOCCAL NUCLEASE                    | Biological unit of either native or mutant is monomer in the PDB |
| 1SND | B | STAPHYLOCOCCUS AUREUS | STAPHYLOCOCCAL NUCLEASE DIMER              |                                                                  |
| 1KDB | A | STAPHYLOCOCCUS AUREUS | STAPHYLOCOCCAL NUCLEASE                    | Biological unit of either native or mutant is monomer in the PDB |
| 1SND | B | STAPHYLOCOCCUS AUREUS | STAPHYLOCOCCAL NUCLEASE DIMER              |                                                                  |
| 1KAA | A | STAPHYLOCOCCUS AUREUS | STAPHYLOCOCCAL NUCLEASE                    | Biological unit of either native or mutant is monomer in the PDB |
| 1SND | B | STAPHYLOCOCCUS AUREUS | STAPHYLOCOCCAL NUCLEASE DIMER              |                                                                  |
| 1SNC | A | STAPHYLOCOCCUS AUREUS | THERMONUCLEASE PRECURSOR                   | Biological unit of either native or mutant is monomer in the PDB |
| 1SND | B | STAPHYLOCOCCUS AUREUS | STAPHYLOCOCCAL NUCLEASE DIMER              |                                                                  |
| 1KDA | A | STAPHYLOCOCCUS AUREUS | STAPHYLOCOCCAL NUCLEASE                    | Biological unit of either native or mutant is monomer in the PDB |
| 1SND | B | STAPHYLOCOCCUS AUREUS | STAPHYLOCOCCAL NUCLEASE DIMER              |                                                                  |
| 1KAB | A | STAPHYLOCOCCUS AUREUS | STAPHYLOCOCCAL NUCLEASE                    | Biological unit of either native or mutant is monomer in the PDB |
| 1SND | B | STAPHYLOCOCCUS AUREUS | STAPHYLOCOCCAL NUCLEASE DIMER              |                                                                  |
| 2UY9 | A | BACILLUS SUBTILIS     | OXALATE DECARBOXYLASE OXDC                 | Biological unit of either native or mutant is monomer in the PDB |
| 2UYA | A | BACILLUS SUBTILIS     | OXALATE DECARBOXYLASE OXDC                 |                                                                  |
| 3LKY | A | GRIFFITHSIA           | GRIFFITHSIN                                | Biological unit of either native or mutant is monomer in the PDB |
| 2GTY | A | GRIFFITHSIA           | GRIFFITHSIN                                |                                                                  |
| 3LLO | A | GRIFFITHSIA           | GRIFFITHSIN                                | Biological unit of either native or mutant is monomer in the PDB |
| 3LKY | A | GRIFFITHSIA           | GRIFFITHSIN                                |                                                                  |
| 3KRA | C | MENTHA X PIPERITA     | GERANYL DIPHOSPHATE SYNTHASE SMALL SUBUNIT | <u>Native can exist as monomer LINK</u>                          |
| 3OAC | C | MENTHA X PIPERITA     | GERANYL DIPHOSPHATE SYNTHASE SMALL SUBUNIT |                                                                  |
| 2NPP | C | HOMO SAPIENS          | COMPND 18 ALPHA ISOFORM                    | Monomer (catalytic subunit) from PP2A                            |
| 3P71 | C | HOMO SAPIENS          | COMPND 10 ALPHA ISOFORM                    |                                                                  |
| 3VOG | C | CIONA INTESTINALIS    | VOLTAGE-SENSOR CONTAINING PHOSPHATASE      | Biological unit of either native or mutant is monomer in the PDB |
| 3VOJ | B | CIONA INTESTINALIS    | VOLTAGE-SENSOR CONTAINING PHOSPHATASE      |                                                                  |



|      |   |                                                 |                                              |                                                                  |
|------|---|-------------------------------------------------|----------------------------------------------|------------------------------------------------------------------|
| 4K03 | B | DROSOPHILA MELANOGASTER                         | CRYPTOCHROME-1                               | <a href="#">Native can exist as monomer LINK</a>                 |
| 4JZY | B | DROSOPHILA MELANOGASTER                         | CRYPTOCHROME-1                               |                                                                  |
| 4NXT | A | HOMO SAPIENS                                    | MITOCHONDRIAL DYNAMIC PROTEIN MID51          | Biological unit of either native or mutant is monomer in the PDB |
| 4NXX | A | HOMO SAPIENS                                    | MITOCHONDRIAL DYNAMIC PROTEIN MID51          |                                                                  |
| 4OYC | B | SALMONELLA TYPHIMURIUM                          | LIPOPROTEIN PRGK                             | Biological unit of either native or mutant is monomer in the PDB |
| 4OYC | A | SALMONELLA TYPHIMURIUM                          | LIPOPROTEIN PRGK                             |                                                                  |
| 4QK2 | A | HOMO SAPIENS                                    | CARBONIC ANHYDRASE 2                         | Biological unit of either native or mutant is monomer in the PDB |
| 4QK3 | A | HOMO SAPIENS                                    | CARBONIC ANHYDRASE 2                         |                                                                  |
| 2HKK | A | HOMO SAPIENS                                    | CARBONIC ANHYDRASE 2                         | Biological unit of either native or mutant is monomer in the PDB |
| 4QK3 | A | HOMO SAPIENS                                    | CARBONIC ANHYDRASE 2                         |                                                                  |
| 5B3Y | A | HOMO SAPIENS, ESCHERICHIA COLI K-12             | COMPND 3 MALTOSE-BINDING PERIPLASMIC PROTEIN | Biological unit of either native or mutant is monomer in the PDB |
| 5B3X | A | HOMO SAPIENS, ESCHERICHIA COLI K-12             | COMPND 3 MALTOSE-BINDING PERIPLASMIC PROTEIN |                                                                  |
| 4LRM | D | HOMO SAPIENS                                    | EPIDERMAL GROWTH FACTOR RECEPTOR             | Biological unit of either native or mutant is monomer in the PDB |
| 5CAV | A | HOMO SAPIENS                                    | EPIDERMAL GROWTH FACTOR RECEPTOR             |                                                                  |
| 5CVD | A | HOMO SAPIENS                                    | N-TERMINAL XAA-PRO-LYS N-METHYLTRANSFERASE 1 | Monomeric unit in a heteromer                                    |
| 5E2B | B | HOMO SAPIENS                                    | N-TERMINAL XAA-PRO-LYS N-METHYLTRANSFERASE 1 |                                                                  |
| 5E8E | H | HOMO SAPIENS                                    | THROMBIN HEAVY CHAIN                         | Monomeric unit in a heteromer                                    |
| 3GIC | B | HOMO SAPIENS                                    | THROMBIN HEAVY CHAIN                         |                                                                  |
| 5EJW | A | MUS MUSCULUS                                    | CHROMOBX PROTEIN HOMOLOG 7                   | Biological unit of either native or mutant is monomer in the PDB |
| 4X3K | A | MUS MUSCULUS                                    | CHROMOBX PROTEIN HOMOLOG 7                   |                                                                  |
| 5GQM | A | BOMBYX MORI CYPOVIRUS 1                         | POLYHEDRIN                                   | <a href="#">Native can exist as monomer LINK</a>                 |
| 5GQJ | A | BOMBYX MORI CYPOVIRUS 1                         | POLYHEDRIN                                   |                                                                  |
| 5GQI | A | BOMBYX MORI CYPOVIRUS 1                         | POLYHEDRIN                                   | <a href="#">Native can exist as monomer LINK</a>                 |
| 5GQN | A | BOMBYX MORI CYPOVIRUS 1                         | POLYHEDRIN                                   |                                                                  |
| 5EXY | A | BOMBYX MORI CYTOPLASMIC POLYHEDROSIS VIRUS      | POLYHEDRIN                                   | <a href="#">Native can exist as monomer LINK</a>                 |
| 5GQN | A | BOMBYX MORI CYPOVIRUS 1                         | POLYHEDRIN                                   |                                                                  |
| 1HZB | A | BACILLUS CALDOLYTICUS                           | COLD SHOCK PROTEIN CSPB                      | <a href="#">Native can exist as monomer LINK</a>                 |
| 5JX4 | B | BACILLUS CALDOLYTICUS                           | COLD SHOCK PROTEIN CSPB                      |                                                                  |
| 5JX8 | B | VACCINIA VIRUS (STRAIN WESTERN RESERVE)         | URACIL-DNA GLYCOSYLASE                       | <a href="#">Native can exist as monomer LINK</a>                 |
| 4IRB | B | VACCINIA VIRUS ANKARA                           | URACIL-DNA GLYCOSYLASE                       |                                                                  |
| 5K6B | F | HUMAN RESPIRATORY SYNCYTIAL VIRUS A             | FUSION GLYCOPROTEIN F0                       | <a href="#">Native can exist as monomer LINK</a>                 |
| 5K6C | F | HUMAN RESPIRATORY SYNCYTIAL VIRUS A (STRAIN A2) | FUSION GLYCOPROTEIN F0                       |                                                                  |
| 5KC6 | B | HOMO SAPIENS                                    | CEREBELLIN-1                                 | <a href="#">Native can exist as monomer LINK</a>                 |
| 5KWR | A | RATTUS NORVEGICUS                               | CEREBELLIN-1                                 |                                                                  |
| 1LZ5 | A | HOMO SAPIENS                                    | HUMAN LYSOZYME                               | Biological unit of either native or mutant is monomer in the PDB |
| 5LVK | B | HOMO SAPIENS                                    | LYSOZYME C                                   |                                                                  |
| 1LZ6 | A | HOMO SAPIENS                                    | HUMAN LYSOZYME                               | Biological unit of either native or mutant is monomer in the PDB |
| 5LVK | B | HOMO SAPIENS                                    | LYSOZYME C                                   |                                                                  |
| 1LMT | A | HOMO SAPIENS                                    | HUMAN LYSOZYME                               | Biological unit of either native or mutant is monomer in the PDB |
| 5LVK | B | HOMO SAPIENS                                    | LYSOZYME C                                   |                                                                  |

|      |   |                                            |                                                                        |                                                                  |
|------|---|--------------------------------------------|------------------------------------------------------------------------|------------------------------------------------------------------|
| 5LVK | B | HOMO SAPIENS                               | LYSOZYME C                                                             | Biological unit of either native or mutant is monomer in the PDB |
| 1DI4 | A | HOMO SAPIENS                               | LYSOZYME C                                                             |                                                                  |
| 5MXN | f | VIBRIO CHOLERAE                            | TYPE VI SECRETION PROTEIN                                              | Exists as a octadecamer                                          |
| 5OJQ | G | VIBRIO CHOLERAE                            | VIPA                                                                   |                                                                  |
| 5BOZ | C | RICINUS COMMUNIS                           | RICIN                                                                  | Disulphide linked dimer of A and B chains                        |
| 5SV3 | D | RICINUS COMMUNIS                           | RICIN                                                                  |                                                                  |
| 5THF | C | INFLUENZA A VIRUS                          | HEMAGGLUTININ HA1 CHAIN                                                | <u>Native can exist as monomer LINK</u>                          |
| 5UMN | A | INFLUENZA A VIRUS                          | HEMAGGLUTININ                                                          |                                                                  |
| 5VG3 | C | BACILLUS SUBTILIS                          | OXALATE DECARBOXYLASE                                                  | Exists as a hexamer                                              |
| 2UYA | A | BACILLUS SUBTILIS                          | OXALATE DECARBOXYLASE OXDC                                             |                                                                  |
| 1K5M | B | HUMAN RHINOVIRUS 14                        | CHIMERA OF HRV14 COAT PROTEIN VP2 (P1B) AND THE V3 LOOP OF HIV-1 GP120 | Exists as Hetero 240-mer                                         |
| 5W3M | C | HUMAN RHINOVIRUS 14                        | VIRAL PROTEIN 2                                                        |                                                                  |
| 5W57 | A | PARACOCCLUS DENITRIFICANS (STRAIN PD 1222) | PERIPLASMIC SOLUTE BINDING PROTEIN                                     | Biological unit of either native or mutant is monomer in the PDB |
| 5KZJ | A | PARACOCCLUS DENITRIFICANS (STRAIN PD 1222) | PERIPLASMIC SOLUTE BINDING PROTEIN                                     |                                                                  |
| 4RCA | A | HOMO SAPIENS                               | RECEPTOR-TYPE TYROSINE-PROTEIN PHOSPHATASE DELTA                       | Biological unit of either native or mutant is monomer in the PDB |
| 2YD7 | A | HOMO SAPIENS                               | PTPRD PROTEIN                                                          |                                                                  |
| 3LL0 | A | GRIFFITHSIA                                | GRIFFITHSIN                                                            | Biological unit of either native or mutant is monomer in the PDB |
| 2GTY | A | GRIFFITHSIA                                | GRIFFITHSIN                                                            |                                                                  |
| 3V0E | A | CIONA INTESTINALIS                         | VOLTAGE-SENSOR CONTAINING PHOSPHATASE                                  | Biological unit of either native or mutant is monomer in the PDB |
| 3V0J | B | CIONA INTESTINALIS                         | VOLTAGE-SENSOR CONTAINING PHOSPHATASE                                  |                                                                  |
| 4GNQ | A | RATTUS NORVEGICUS                          | PHOSPHOENOLPYRUVATE CARBOXYKINASE, CYTOSOLIC [GTP]                     | Biological unit of either native or mutant is monomer in the PDB |
| 4GMM | A | RATTUS NORVEGICUS                          | PHOSPHOENOLPYRUVATE CARBOXYKINASE, CYTOSOLIC [GTP]                     |                                                                  |
| 1E21 | A | HOMO SAPIENS                               | RIBONUCLEASE 1                                                         | Biological unit of either native or mutant is monomer in the PDB |
| 4KXH | D | HOMO SAPIENS                               | RIBONUCLEASE PANCREATIC                                                |                                                                  |
| 5LWF | B | BACILLUS LICHENIFORMIS                     | BETA-LACTAMASE                                                         | Biological unit of either native or mutant is monomer in the PDB |
| 4BLM | A | BACILLUS LICHENIFORMIS                     | BETA-LACTAMASE                                                         |                                                                  |
| 1D1M | B | ENTEROBACTERIA PHAGE LAMBDA                | LAMBDA CRO REPRESSOR                                                   | <u>Native can exist as monomer LINK</u>                          |
| 1D1L | A | ENTEROBACTERIA PHAGE LAMBDA                | LAMBDA CRO REPRESSOR                                                   |                                                                  |
| 2DFF | A | THERMOCOCCUS KODAKARENSIS                  | RIBONUCLEASE HII                                                       | Biological unit of either native or mutant is monomer in the PDB |
| 2DFE | A | THERMOCOCCUS KODAKARENSIS                  | RIBONUCLEASE HII                                                       |                                                                  |
| 2DFH | A | THERMOCOCCUS KODAKARENSIS                  | RIBONUCLEASE HII                                                       | Biological unit of either native or mutant is monomer in the PDB |
| 2DFF | A | THERMOCOCCUS KODAKARENSIS                  | RIBONUCLEASE HII                                                       |                                                                  |
| 2DFH | A | THERMOCOCCUS KODAKARENSIS                  | RIBONUCLEASE HII                                                       | Biological unit of either native or mutant is monomer in the PDB |
| 2DFE | A | THERMOCOCCUS KODAKARENSIS                  | RIBONUCLEASE HII                                                       |                                                                  |
| 2DMF | A | HOMO SAPIENS                               | RING FINGER PROTEIN 25                                                 | Biological unit of either native or mutant is monomer in the PDB |
| 2DAY | A | HOMO SAPIENS                               | RING FINGER PROTEIN 25                                                 |                                                                  |
| 2GBK | D | HOMO SAPIENS                               | UBIQUITIN                                                              | Biological unit of either native or mutant is monomer in the PDB |
| 3EEC | A | HOMO SAPIENS                               | UBIQUITIN                                                              |                                                                  |
| 2KJK | A | LISTERIA INNOCUA                           | LIN2157 PROTEIN                                                        | Biological unit of either native or mutant is monomer in the PDB |

|      |   |                                   |                                  |                                                                      |
|------|---|-----------------------------------|----------------------------------|----------------------------------------------------------------------|
| 311E | B | LISTERIA INNOCUA                  | LIN2157 PROTEIN                  |                                                                      |
| 3Q29 | C | ESCHERICHIA COLI, HOMO SAPIENS    | CHIMERIC PROTEIN                 | Biological unit of either native or mutant is monomer in the PDB     |
| 3Q26 | A | ESCHERICHIA COLI, HOMO SAPIENS    | CHIMERIC PROTEIN                 |                                                                      |
| 2KY9 | A | BACILLUS SUBTILIS                 | UNCHARACTERIZED PROTEIN YDHK     | Biological unit of either native or mutant is monomer in the PDB     |
| 4FIB | C | BACILLUS SUBTILIS SUBSP. SUBTILIS | UNCHARACTERIZED PROTEIN YDHK     |                                                                      |
| 4O4F | A | ENTAMOEBA HISTOLYTICA             | INOSITOL HEXAKISPHOSPHATE KINASE | Biological unit of either native or mutant is monomer in the PDB     |
| 4O4B | B | ENTAMOEBA HISTOLYTICA             | INOSITOL HEXAKISPHOSPHATE KINASE |                                                                      |
| 104L | B | ENTEROBACTERIA PHAGE T4           | T4 LYSOZYME                      | Biological unit of either native or mutant is monomer in the PDB     |
| 1L68 | A | ENTEROBACTERIA PHAGE T4           | LYSOZYME                         |                                                                      |
| 104L | B | ENTEROBACTERIA PHAGE T4           | T4 LYSOZYME                      | Biological unit of either native or mutant is monomer in the PDB     |
| 171L | A | ENTEROBACTERIA PHAGE T4           | T4 LYSOZYME                      |                                                                      |
| 3IFK | A | RATTUS NORVEGICUS                 | CALMODULIN                       | Biological unit of either native or mutant is monomer in the PDB     |
| 1AHR | A | GALLUS GALLUS                     | CALMODULIN                       |                                                                      |
| 1C7P | A | HOMO SAPIENS                      | LYSOZYME                         | Biological unit of either native or mutant is monomer in the PDB     |
| 1DI4 | A | HOMO SAPIENS                      | LYSOZYME C                       |                                                                      |
| 1FRS | A | ENTEROBACTERIA PHAGE FR           | BACTERIOPHAGE FR CAPSID          | Exist as trimer                                                      |
| 1FR5 | C | ENTEROBACTERIA PHAGE FR           | BACTERIOPHAGE FR CAPSID          |                                                                      |
| 1IFG | A | ESCHERICHIA COLI                  | ECOTIN                           | Biological unit of either native or mutant is monomer in the PDB     |
| 1AZZ | C | ESCHERICHIA COLI                  | ECOTIN                           |                                                                      |
| 1MB8 | A | HOMO SAPIENS                      | PLECTIN                          | Biological unit of either native or mutant is monomer in the PDB     |
| 4Q59 | A | HOMO SAPIENS                      | PLECTIN                          |                                                                      |
| 1SRA | A | HOMO SAPIENS                      | SPARC                            | Biological unit of either native or mutant is monomer in the PDB     |
| 1NUB | B | HOMO SAPIENS                      | BASEMENT MEMBRANE PROTEIN BM-40  |                                                                      |
| 1RJ7 | H | HOMO SAPIENS                      | ECTODYSPLASIN A                  | Exists as trimer                                                     |
| 1RJ8 | G | HOMO SAPIENS                      | ECTODYSPLASIN-A ISOFORM EDA-A2   |                                                                      |
| 1S16 | A | ESCHERICHIA COLI                  | TOPOISOMERASE IV SUBUNIT B       | Biological unit of either native or mutant is monomer in the PDB     |
| 1S14 | B | ESCHERICHIA COLI                  | TOPOISOMERASE IV SUBUNIT B       |                                                                      |
| 1STA | A | STAPHYLOCOCCUS AUREUS             | STAPHYLOCOCCAL NUCLEASE          | Biological unit of either native or mutant is monomer in the PDB     |
| 2F3W | A | STAPHYLOCOCCUS AUREUS             | THERMONUCLEASE                   |                                                                      |
| 209L | A | ENTEROBACTERIA PHAGE T4           | T4 LYSOZYME                      | Biological unit of either native or mutant is monomer in the PDB     |
| 210L | A | ENTEROBACTERIA PHAGE T4           | T4 LYSOZYME                      |                                                                      |
| 2CME | B | HUMAN SARS CORONAVIRUS            | HYPOTHETICAL PROTEIN 5           | Exist as dimer                                                       |
| 2CME | H | HUMAN SARS CORONAVIRUS            | HYPOTHETICAL PROTEIN 5           |                                                                      |
| 1M7V | A | BACILLUS SUBTILIS                 | NITRIC OXIDE SYNTHASE            | <u>Native can exist as monomer LINK</u>                              |
| 2FC1 | A | BACILLUS SUBTILIS                 | NITRIC OXIDE SYNTHASE            |                                                                      |
| 3AFI | E | BRADYRHIZOBIUM JAPONICUM          | HALOALKANE DEHALOGENASE          | Interaction subunit of either native or mutant is monomer in Uniprot |
| 3A2L | B | BRADYRHIZOBIUM JAPONICUM          | HALOALKANE DEHALOGENASE          |                                                                      |
| 3AAK | A | HOMO SAPIENS                      | PROGRAMMED CELL DEATH PROTEIN 6  | Native can exist as monomer LINK                                     |
| 3AAJ | A | HOMO SAPIENS                      | PROGRAMMED CELL DEATH PROTEIN 6  |                                                                      |
| 2ZRS | C | HOMO SAPIENS                      | PROGRAMMED CELL DEATH PROTEIN 6  | Native can exist as monomer LINK                                     |
| 3AAJ | A | HOMO SAPIENS                      | PROGRAMMED CELL DEATH PROTEIN 6  |                                                                      |
| 3QDO | A | RATTUS NORVEGICUS                 | POTASSIUM CHANNEL 3 CHIMERA      | Exists as dimer                                                      |

|      |   |                                    |                                                                                      |                                                                        |
|------|---|------------------------------------|--------------------------------------------------------------------------------------|------------------------------------------------------------------------|
| 3QE1 | A | RATTUS NORVEGICUS                  | POTASSIUM CHANNEL 3 CHIMERA                                                          |                                                                        |
| 4E89 | A | XENOTROPIC MULV-RELATED VIRUS      | RNASE H                                                                              | Biological unit of either native or mutant is monomer in the PDB       |
| 3V1Q | A | XENOTROPIC MULV-RELATED VIRUS VP35 | REVERSE TRANSCRIPTASE/RIBONUCLEASE H P80                                             |                                                                        |
| 4AMJ | B | MELEAGRIS GALLOPAVO                | BETA-1 ADRENERGIC RECEPTOR                                                           | Biological unit of either native or mutant is monomer in the PDB       |
| 2YCX | A | MELEAGRIS GALLOPAVO                | BETA-1 ADRENERGIC RECEPTOR                                                           |                                                                        |
| 2X5X | A | PAUCIMONAS LEMOIGNEI               | PHB DEPOLYMERASE PHAZ7                                                               | Biological unit of either native or mutant is monomer in the PDB       |
| 4BVL | D | PAUCIMONAS LEMOIGNEI               | PHB DEPOLYMERASE PHAZ7                                                               |                                                                        |
| 4LZB | I | VACCINIA VIRUS                     | URACIL-DNA GLYCOSYLASE                                                               | Exists as dimer                                                        |
| 4IRB | B | VACCINIA VIRUS ANKARA              | URACIL-DNA GLYCOSYLASE                                                               |                                                                        |
| 4GU5 | A | DROSOPHILA MELANOGASTER            | CRYPTOCHROME-1                                                                       | Biological unit of either native or mutant is monomer in the PDB       |
| 4JZY | B | DROSOPHILA MELANOGASTER            | CRYPTOCHROME-1                                                                       |                                                                        |
| 3SJZ | A | SULFOLOBUS SOLFATARICUS P2         | TRANSLATION INITIATION FACTOR 2 SUBUNIT GAMMA                                        | Biological unit of either native or mutant is monomer in the PDB       |
| 4M53 | A | SULFOLOBUS SOLFATARICUS            | TRANSLATION INITIATION FACTOR 2 SUBUNIT GAMMA                                        |                                                                        |
| 3RBB | A | HIV-1 M                            | PROTEIN NEF                                                                          | Interaction subunit of either native or mutant is monomer in Uniprot   |
| 4ORZ | B | HIV-1 M                            | PROTEIN NEF                                                                          |                                                                        |
| 1SH6 | A | MUS MUSCULUS                       | PLECTIN 1                                                                            | Biological unit of either native or mutant is monomer in the PDB       |
| 4Q57 | B | MUS MUSCULUS                       | PLECTIN                                                                              |                                                                        |
| 5L6T | B | HOMO SAPIENS                       | CARBONIC ANHYDRASE 2                                                                 | Biological unit of either native or mutant is monomer in the PDB       |
| 4QK3 | A | HOMO SAPIENS                       | CARBONIC ANHYDRASE 2                                                                 |                                                                        |
| 5APY | C | SACCHAROMYCES CEREVISIAE           | GENERAL CONTROL PROTEIN GCN4                                                         | <u>Native can exist as monomer LINK</u>                                |
| 5APW | B | SACCHAROMYCES CEREVISIAE           | GENERAL CONTROL PROTEIN GCN4                                                         |                                                                        |
| 5AZ8 | A | ESCHERICHIA COLI (STRAIN K12)      | RECEPTOR SUBUNIT TOM20 HOMOLOG                                                       | Biological unit of either native or mutant is monomer in the PDB       |
| 5AZ6 | B | ESCHERICHIA COLI (STRAIN K12)      | RECEPTOR SUBUNIT TOM20 HOMOLOG                                                       |                                                                        |
| 4WMC | G | KLEBSIELLA PNEUMONIAE              | BETA-LACTAMASE                                                                       | 6PK0 Crystal Structure of OXA-48 with Hydrolyzed Imipenem is a monomer |
| 5FDH | A | SERRATIA MARCESCENS                | BETA-LACTAMASE                                                                       |                                                                        |
| 3AJP | A | HOMO SAPIENS                       | FERRITIN HEAVY CHAIN                                                                 | 24-mer                                                                 |
| 5GN8 | A | HOMO SAPIENS                       | FERRITIN HEAVY CHAIN                                                                 |                                                                        |
| 3AJQ | A | HOMO SAPIENS                       | FERRITIN HEAVY CHAIN                                                                 | 24-mer                                                                 |
| 5GN8 | A | HOMO SAPIENS                       | FERRITIN HEAVY CHAIN                                                                 |                                                                        |
| 3AJP | A | HOMO SAPIENS                       | FERRITIN HEAVY CHAIN                                                                 | 24-mer                                                                 |
| 5GN8 | B | HOMO SAPIENS                       | FERRITIN HEAVY CHAIN                                                                 |                                                                        |
| 4XHS | A | HOMO SAPIENS                       | MALTOSE-BINDING PERIPLASMIC PROTEIN,NACHT, LRR AND PYD DOMAINS-CONTAINING PROTEIN 12 | Biological unit of either native or mutant is monomer in the PDB       |
| 5H7N | B | HOMO SAPIENS                       | NLRP12-PYD WITH MBP TAG                                                              |                                                                        |
| 1X23 | D | HOMO SAPIENS                       | UBIQUITIN-CONJUGATING ENZYME E2 D3                                                   | Biological unit of either native or mutant is monomer in the PDB       |
| 5IFR | A | HOMO SAPIENS                       | UBIQUITIN-CONJUGATING ENZYME E2 D3                                                   |                                                                        |
| 1HKX | E | MUS MUSCULUS                       | II ALPHA CHAIN                                                                       | <u>Native can exist as monomer LINK</u>                                |
| 5IG3 | A | HOMO SAPIENS                       | ALPHA                                                                                |                                                                        |
| 5IG6 | A | HOMO SAPIENS                       | BROMODOMAIN-CONTAINING PROTEIN 2                                                     | Biological unit of either native or mutant is monomer in the PDB       |
| 2DVV | A | HOMO SAPIENS                       | BROMODOMAIN-CONTAINING PROTEIN 2                                                     |                                                                        |
| 5JBH | 7 | PYROCOCCUS ABYSSI GE5              | AIF2-GAMMA                                                                           | Biological unit of either native or mutant is monomer in the PDB       |

|      |   |                                             |                                                         |                                                                   |
|------|---|---------------------------------------------|---------------------------------------------------------|-------------------------------------------------------------------|
| 3SJZ | A | SULFOLOBUS SOLFATARICUS P2                  | TRANSLATION INITIATION FACTOR 2 SUBUNIT GAMMA           |                                                                   |
| 5JBH | 7 | PYROCOCCUS ABYSSI GE5                       | AIF2-GAMMA                                              | Biological unit of either native or mutant is monomer in the PDB  |
| 3PEN | A | SULFOLOBUS SOLFATARICUS                     | TRANSLATION INITIATION FACTOR 2 SUBUNIT GAMMA           |                                                                   |
| 5JVG | M | DEINOCOCCUS RADIODURANS R1                  | 50S RIBOSOMAL PROTEIN L19                               | Exists as 29-mer                                                  |
| 5DM6 | M | DEINOCOCCUS RADIODURANS                     | 50S RIBOSOMAL PROTEIN L19                               |                                                                   |
| 5JVS | A | DROSOPHILA MELANOGASTER                     | ASSOCIATED PROTEIN RP/EB FAMILY MEMBER 1                | <a href="#">Native can exist as monomer LINK</a>                  |
| 5JVR | F | DROSOPHILA MELANOGASTER                     | HUMAN EB1                                               |                                                                   |
| 5JVU | B | DROSOPHILA MELANOGASTER, HOMO SAPIENS       | ASSOCIATED PROTEIN RP/EB FAMILY MEMBER 1                | <a href="#">Native can exist as monomer LINK</a>                  |
| 5JVR | C | MUS MUSCULUS, DROSOPHILA MELANOGASTER, HOMO | HUMAN EB1                                               |                                                                   |
| 5KDO | A | RATTUS NORVEGICUS                           | GUANINE NUCLEOTIDE-BINDING PROTEIN G(I) SUBUNIT ALPHA-1 | Biological unit of either native or mutant is monomer in the PDB  |
| 1GIA | A | RATTUS NORVEGICUS                           | G PROTEIN GI ALPHA 1                                    |                                                                   |
| 2X0L | A | HOMO SAPIENS                                | LYSINE-SPECIFIC HISTONE DEMETHYLASE 1                   | Occurrence of monomeric state in PDB forming different heteromers |
| 5LGU | A | HOMO SAPIENS                                | LYSINE-SPECIFIC HISTONE DEMETHYLASE 1A                  |                                                                   |
| 5LGN | A | HOMO SAPIENS                                | LYSINE-SPECIFIC HISTONE DEMETHYLASE 1A                  | Occurrence of monomeric state in PDB forming different heteromers |
| 5LGU | A | HOMO SAPIENS                                | LYSINE-SPECIFIC HISTONE DEMETHYLASE 1A                  |                                                                   |
| 3MHY | B | AZOSPIRILLUM BRASILENSE                     | PII-LIKE PROTEIN PZ                                     | Exist as trimer                                                   |
| 5OVO | B | AZOSPIRILLUM BRASILENSE                     | NITROGEN REGULATORY PROTEIN P-II 1                      |                                                                   |
| 1IFS | A | RICINUS COMMUNIS                            | RICIN                                                   | Disulfide linked dimer of A and B chains                          |
| 5SV3 | D | RICINUS COMMUNIS                            | RICIN                                                   |                                                                   |
| 104L | A | ENTEROBACTERIA PHAGE T4                     | T4 LYSOZYME                                             | Biological unit of either native or mutant is monomer in the PDB  |
| 5VNR | A | ENTEROBACTERIA PHAGE T4                     | ENDOLYSIN                                               |                                                                   |
| 209L | A | ENTEROBACTERIA PHAGE T4                     | T4 LYSOZYME                                             | Biological unit of either native or mutant is monomer in the PDB  |
| 5VNR | A | ENTEROBACTERIA PHAGE T4                     | ENDOLYSIN                                               |                                                                   |
| 5W57 | B | PARACOCCUS DENITRIFICANS (STRAIN PD 1222)   | PERIPLASMIC SOLUTE BINDING PROTEIN                      | Biological unit of either native or mutant is monomer in the PDB  |
| 5KZJ | A | PARACOCCUS DENITRIFICANS (STRAIN PD 1222)   | PERIPLASMIC SOLUTE BINDING PROTEIN                      |                                                                   |
| 5H7Q | A | HOMO SAPIENS                                | MNDA PYD DOMAIN WITH MBP TAG                            | Biological unit of either native or mutant is monomer in the PDB  |
| 5WQ6 | D | HOMO SAPIENS                                | MBP TAGGED HMNDA-PYD                                    |                                                                   |
| 5Y32 | A | MUS MUSCULUS                                | RECEPTOR-TYPE TYROSINE-PROTEIN PHOSPHATASE DELTA        | Biological unit of either native or mutant is monomer in the PDB  |
| 2YD7 | A | HOMO SAPIENS                                | PTPRD PROTEIN                                           |                                                                   |
| 5YI5 | X | HOMO SAPIENS                                | FERRITIN HEAVY CHAIN                                    | 24-mer                                                            |
| 5GN8 | A | HOMO SAPIENS                                | FERRITIN HEAVY CHAIN                                    |                                                                   |
| 5YI5 | X | HOMO SAPIENS                                | FERRITIN HEAVY CHAIN                                    | 24-mer                                                            |
| 5GN8 | B | HOMO SAPIENS                                | FERRITIN HEAVY CHAIN                                    |                                                                   |
| 1JJ1 | A | THERMOACTINOMYCES VULGARIS                  | ALPHA-AMYLASE I                                         | Biological unit of either native or mutant is monomer in the PDB  |
| 5Z0U | A | THERMOACTINOMYCES VULGARIS                  | NEOPULLULANASE 1                                        |                                                                   |
| 1ORC | A | ENTEROBACTERIA PHAGE LAMBDA                 | CRO REPRESSOR INSERTION MUTANT K56-[DGEVK]              | Biological unit of either native or mutant is monomer in the PDB  |
| 6CRO | A | ENTEROBACTERIA PHAGE LAMBDA                 | LAMBDA CRO REPRESSOR                                    |                                                                   |

\* Evidence of existence as monomer of either the native (wt) or mutant protein is shown. The links point to articles describing the existence of the protein as monomeric units.

# The odd numbered entries correspond to the wt and the even numbered entries correspond to the mutant protein.
